# Supplementary material for: Type 2 and type 17 effector cells are increased in the duodenal mucosa but not peripheral blood of patients with functional dyspepsia
Source: PubMed Central journal article supplement (PMC9852875; doi:10.3389/fimmu.2022.1051632), 2023-01-06
Supplement: DataSheet_1.pdf [file DataSheet_1.pdf]

**Supplementary Table 1: List of antibodies used in surface marker flow cytometry staining for identification of lymphocyte subsets**

| <b>Antibody target</b> | <b>Fluorophore</b> | <b>Clone</b> | <b>Supplier</b>                | <b>Vol./100<math>\mu</math>L test</b> |
|------------------------|--------------------|--------------|--------------------------------|---------------------------------------|
| CD3                    | BUV805             | UCHT1        | BD Biosciences, cat no. 612896 | 2 $\mu$ L                             |
| CD4                    | FITC               | RPA-T4       | BD Biosciences, cat no. 555346 | 5 $\mu$ L                             |
| CD8                    | BUV496             | RPA-T8       | BD Biosciences, cat no. 612942 | 2 $\mu$ L                             |
| CD45RA                 | BUV395             | 5H9          | BD Biosciences, cat no. 740315 | 2 $\mu$ L                             |
| CD45RO                 | PE-CY7             | UCHL1        | BD Biosciences, cat no. 560608 | 2 $\mu$ L                             |
| CCR7 (CD197)           | BV711              | 150503       | BD Biosciences, cat no. 566602 | 5 $\mu$ L                             |
| CCR6 (CD196)           | BV786              | 11A9         | BD Biosciences, cat no. 563704 | 5 $\mu$ L                             |
| CCR4 (CD194)           | BV421              | 1G1          | BD Biosciences, cat no. 562579 | 5 $\mu$ L                             |
| CXCR3 (CD183)          | PE                 | 1C6          | BD Biosciences, cat no. 557185 | 15 $\mu$ L                            |
| Integrin $\alpha$ 4    | PE-CF594           | 9F10         | BD Biosciences, cat no. 563645 | 5 $\mu$ L                             |
| Integrin $\beta$ 7     | BV650              | FIB504       | BD Biosciences, cat no. 564285 | 5 $\mu$ L                             |
| CCR9                   | APC                | 112509       | BD Biosciences, cat no. 557975 | 2 $\mu$ L                             |
| Fixable viability dye  | FVS700             | N/A          | BD Biosciences, cat no. 564997 | 1:1000                                |

**Supplementary Table 2: Surface markers for the identification of T cell subsets**

| T cell subset                      | Surface maker phenotype                                                                                                                                                                                            |
|------------------------------------|--------------------------------------------------------------------------------------------------------------------------------------------------------------------------------------------------------------------|
| Lymphocytes                        | CD3 <sup>+</sup>                                                                                                                                                                                                   |
| T helper cells                     | CD3 <sup>+</sup> CD4 <sup>+</sup>                                                                                                                                                                                  |
| Cytotoxic T cells                  | CD3 <sup>+</sup> CD8 <sup>+</sup>                                                                                                                                                                                  |
| Naïve T cells                      | CD4 <sup>+</sup> CD45RA <sup>+</sup> CCR7 <sup>+</sup> /CD8 <sup>+</sup> CD45RA <sup>+</sup> CCR7 <sup>+</sup>                                                                                                     |
| Effector T cells                   | CD4 <sup>+</sup> CD45RA <sup>+</sup> CCR7 <sup>-</sup> /CD8 <sup>+</sup> CD45RA <sup>+</sup> CCR7 <sup>-</sup>                                                                                                     |
| Central memory T cells             | CD4 <sup>+</sup> CD45RO <sup>+</sup> CCR7 <sup>+</sup> /CD8 <sup>+</sup> CD45RO <sup>+</sup> CCR7 <sup>+</sup>                                                                                                     |
| Effector memory T cells            | CD4 <sup>+</sup> CD45RO <sup>+</sup> CCR7 <sup>-</sup> /CD8 <sup>+</sup> CD45RO <sup>+</sup> CCR7 <sup>-</sup>                                                                                                     |
| Small intestinal homing T cells    | CD4 <sup>+</sup> α4 <sup>+</sup> β7 <sup>+</sup> CCR9 <sup>+</sup> /CD8 <sup>+</sup> α4 <sup>+</sup> β7 <sup>+</sup> CCR9 <sup>+</sup>                                                                             |
| Effector Th1-like T cells          | CD4 <sup>+</sup> CD45RA <sup>+</sup> CCR7 <sup>-</sup> CCR6 <sup>-</sup> CXCR3 <sup>+</sup>                                                                                                                        |
| Effector Th2-like T cells          | CD4 <sup>+</sup> CD45RA <sup>+</sup> CCR7 <sup>-</sup> CCR6 <sup>-</sup> CCR4 <sup>+</sup>                                                                                                                         |
| Effector Th17-like T cells         | CD4 <sup>+</sup> CD45RA <sup>+</sup> CCR7 <sup>-</sup> CCR6 <sup>+</sup> CCR4 <sup>+</sup>                                                                                                                         |
| Effector gut-homing T cells        | CD4 <sup>+</sup> CD45RA <sup>+</sup> CCR7 <sup>-</sup> α4 <sup>+</sup> β7 <sup>+</sup> CCR9 <sup>+</sup> /CD8 <sup>+</sup> CD45RA <sup>+</sup> CCR7 <sup>-</sup> α4 <sup>+</sup> β7 <sup>+</sup> CCR9 <sup>+</sup> |
| Central memory Th1-like T cells    | CD4 <sup>+</sup> CD45RO <sup>+</sup> CCR7 <sup>+</sup> CCR6 <sup>-</sup> CXCR3 <sup>+</sup>                                                                                                                        |
| Central memory Th2-like T cells    | CD4 <sup>+</sup> CD45RO <sup>+</sup> CCR7 <sup>+</sup> CCR6 <sup>-</sup> CCR4 <sup>+</sup>                                                                                                                         |
| Central memory Th17-like T cells   | CD4 <sup>+</sup> CD45RO <sup>+</sup> CCR7 <sup>+</sup> CCR6 <sup>+</sup> CCR4 <sup>+</sup>                                                                                                                         |
| Central memory gut-homing T cells  | CD4 <sup>+</sup> CD45RO <sup>+</sup> CCR7 <sup>+</sup> α4 <sup>+</sup> β7 <sup>+</sup> CCR9 <sup>+</sup> /CD8 <sup>+</sup> CD45RO <sup>+</sup> CCR7 <sup>+</sup> α4 <sup>+</sup> β7 <sup>+</sup> CCR9 <sup>+</sup> |
| Effector memory Th1-like T cells   | CD4 <sup>+</sup> CD45RO <sup>+</sup> CCR7 <sup>-</sup> CCR6 <sup>-</sup> CXCR3 <sup>+</sup>                                                                                                                        |
| Effector memory Th2-like T cells   | CD4 <sup>+</sup> CD45RO <sup>+</sup> CCR7 <sup>-</sup> CCR6 <sup>-</sup> CCR4 <sup>+</sup>                                                                                                                         |
| Effector memory Th17-like T cells  | CD4 <sup>+</sup> CD45RO <sup>+</sup> CCR7 <sup>-</sup> CCR6 <sup>+</sup> CCR4 <sup>+</sup>                                                                                                                         |
| Effector memory gut-homing T cells | CD4 <sup>+</sup> CD45RO <sup>+</sup> CCR7 <sup>-</sup> α4 <sup>+</sup> β7 <sup>+</sup> CCR9 <sup>+</sup> /CD8 <sup>+</sup> CD45RO <sup>+</sup> CCR7 <sup>-</sup> α4 <sup>+</sup> β7 <sup>+</sup> CCR9 <sup>+</sup> |

**Supplementary Table 3: Characteristics of duodenal biopsies selected for Phenocycler analysis**

|                                                                            | <b>Control</b> | <b>FD</b> |
|----------------------------------------------------------------------------|----------------|-----------|
| n                                                                          | 1              | 1         |
| Age                                                                        | 63             | 50        |
| Sex                                                                        | M              | M         |
| Eosinophils/hpf*                                                           | 11             | 34        |
| Effector mucosal cells (% CD3 <sup>+</sup> )                               | 1.68           | 1.36      |
| Effector Th2 mucosal cells (% effector mucosal cells) *                    | 0.00           | 1.81      |
| Effector Th17 mucosal cells (% effector mucosal cells) *                   | 17.10          | 26.34     |
| Peripheral CD4 <sup>+</sup> gut-homing T cells (% total CD4 <sup>+</sup> ) | 0              | 0.03      |
| PPI usage                                                                  | No             | No        |
| Co-morbid IBS?                                                             | No             | No        |
| H. pylori status                                                           | Negative       | Negative  |
| Self-reported wheat sensitive?                                             | No             | No        |

\* = factors primarily considered in sample selection

**Supplementary Table 4: Akoya Biosciences Phenocycler targets**

| <b>Marker</b> | <b>Populations identified</b>      |
|---------------|------------------------------------|
| DAPI          | Nuclear stain                      |
| CD3e          | Lymphocytes                        |
| CD20          | B cells                            |
| CD8           | Cytotoxic T cells                  |
| CD68          | Macrophages                        |
| PanCK         | Epithelial cells                   |
| CD44          | Activated T cells                  |
| CD45RO        | Memory T cells                     |
| CD11c         | Dendritic cells                    |
| CD107a        | NK cells, CD8 <sup>+</sup> T cells |
| CD14          | Macrophages/monocytes              |
| CD4           | T helper cells                     |

**Supplementary Table 5: Peripheral T cell populations in FD patients and controls analysed by FD subtype**

|                          | <b>Control<br/>(mean±SD)</b> | <b>PDS<br/>(mean±SD)</b> | <b>EPS±PDS<br/>(mean±SD)</b> | <b>Control vs. PDS<br/>(p value)</b> | <b>Control vs.<br/>EPS±PDS<br/>(p value)</b> | <b>PDS vs.<br/>EPS±PDS<br/>(p value)</b> |
|--------------------------|------------------------------|--------------------------|------------------------------|--------------------------------------|----------------------------------------------|------------------------------------------|
|                          | n=37                         | n=20                     | n=41                         |                                      |                                              |                                          |
| CD3+                     | 41.13±13.70                  | 50.00±23.28              | 46.90±19.04                  | 0.098                                | 0.189                                        | 0.553                                    |
| CD4+                     | 45.63±18.70                  | 44.29±17.83              | 43.44±15.49                  | 0.783                                | 0.566                                        | 0.857                                    |
| CD8+                     | 23.21±15.15                  | 17.03±16.65              | 22.14±13.80                  | 0.246                                | 0.97                                         | 0.258                                    |
| CD4+ effector            | 1.59±2.07                    | 2.06±2.52                | 1.30±1.36                    | 0.461                                | 0.913                                        | 0.399                                    |
| CD4+ effector Th1        | 24.13±24.16                  | 8.29±6.97                | 15.23±15.42                  | 0.027*                               | 0.183                                        | 0.247                                    |
| CD4+ effector Th2        | 16.20±12.34                  | 19.66±11.42              | 17.21±15.75                  | 0.176                                | 0.774                                        | 0.107                                    |
| CD4+ effector Th17       | 4.93±6.59                    | 7.72±9.76                | 4.88±6.42                    | 0.526                                | 0.856                                        | 0.62                                     |
| CD4+ naïve               | 15.35±12.94                  | 15.76±15.61              | 18.50±12.92                  | 0.821                                | 0.277                                        | 0.257                                    |
| CD8+ effector            | 6.08±6.24                    | 2.35±3.46                | 3.10±3.61                    | 0.035*                               | 0.081                                        | 0.493                                    |
| CD8+ naïve               | 5.06±4.24                    | 5.16±5.66                | 9.23±8.56                    | 0.824                                | 0.041*                                       | 0.058                                    |
| CD4+ central memory      | 9.40±6.68                    | 10.37±10.68              | 12.84±9.46                   | 0.707                                | 0.107                                        | 0.33                                     |
| CD4+ central memory Th1  | 9.63±6.44                    | 17.84±13.11              | 14.30±10.01                  | 0.023*                               | 0.056                                        | 0.468                                    |
| CD4+ central memory Th2  | 11.79±7.12                   | 13.15±11.54              | 14.69±11.29                  | 0.867                                | 0.524                                        | 0.481                                    |
| CD4+ central memory Th17 | 31.90±19.01                  | 18.32±20.99              | 21.71±17.89                  | 0.035*                               | 0.048*                                       | 0.618                                    |
| CD4+ effector memory     | 4.13±4.06                    | 2.36±2.90                | 3.59±3.80                    | 0.132                                | 0.658                                        | 0.243                                    |
| CD4+ effector memory Th1 | 27.84±18.22                  | 21.43±14.35              | 25.77±16.67                  | 0.147                                | 0.677                                        | 0.259                                    |
| CD4+ effector memory Th2 | 12.71±10.86                  | 9.53±9.37                | 8.51±9.43                    | 0.123                                | 0.232                                        | 0.569                                    |

|                           |           |           |           |       |       |         |
|---------------------------|-----------|-----------|-----------|-------|-------|---------|
| CD4+ effector memory Th17 | 4.70±3.87 | 3.67±4.81 | 4.10±4.46 | 0.295 | 0.445 | 0.659   |
| CD8+ central memory       | 2.20±2.08 | 1.34±1.63 | 2.71±2.22 | 0.085 | 0.257 | 0.007** |
| CD8+ effector memory      | 1.99±2.48 | 1.27±2.17 | 1.64±1.60 | 0.089 | 0.911 | 0.102   |

**Supplementary Table 6: Duodenal T cell populations in FD patients and controls analysed by FD subtype**

|                           | <b>Control<br/>(mean±SD)</b> | <b>PDS<br/>(mean±SD)</b> | <b>EPS±PDS<br/>(mean±SD)</b> | <b>Control vs. PDS<br/>(p value)</b> | <b>Control vs.<br/>EPS±PDS<br/>(p value)</b> | <b>PDS vs.<br/>EPS±PDS<br/>(p value)</b> |
|---------------------------|------------------------------|--------------------------|------------------------------|--------------------------------------|----------------------------------------------|------------------------------------------|
|                           | n=23                         | n=23                     | n=26                         |                                      |                                              |                                          |
| CD3+                      | 39.90±10.69                  | 37.28±12.76              | 46.19±14.89                  | 0.616                                | 0.08                                         | 0.024*                                   |
| CD4+                      | 32.57±11.12                  | 27.97±16.73              | 29.56±10.92                  | 0.269                                | 0.458                                        | 0.706                                    |
| CD8+                      | 25.67±16.05                  | 18.07±12.70              | 18.96±8.97                   | 0.044*                               | 0.071                                        | 0.817                                    |
| CD4+ effector             | 2.06±2.17                    | 3.13±2.34                | 5.07±3.71                    | 0.116                                | 0.001**                                      | 0.093                                    |
| CD4+ effector Th1         | 7.90±13.22                   | 1.69±3.72                | 0.77±2.06                    | 0.368                                | 0.088                                        | 0.424                                    |
| CD4+ effector Th2         | 13.03±16.11                  | 21.22±14.58              | 18.61±16.48                  | 0.04*                                | 0.113                                        | 0.599                                    |
| CD4+ effector Th17        | 31.74±24.72                  | 40.76±21.590             | 49.83±25.16                  | 0.203                                | 0.009**                                      | 0.187                                    |
| CD4+ naïve                | 1.18±1.08                    | 2.14±2.50                | 1.19±2.44                    | 0.137                                | 0.11                                         | 0.962                                    |
| CD8+ effector             | 2.15±3.95                    | 0.53±0.34                | 1.67±4.70                    | 0.000**                              | 0.192                                        | 0.165                                    |
| CD8+ naïve                | 1.12±1.00                    | 1.15±0.96                | 1.33±1.10                    | 0.688                                | 0.3                                          | 0.542                                    |
| CD4+ central memory       | 3.35±2.68                    | 1.93±1.78                | 2.68±1.40                    | 0.013                                | 0.216                                        | 0.167                                    |
| CD4+ central memory Th1   | 17.14±19.76                  | 9.93±10.79               | 5.04±6.93                    | 0.473                                | 0.032                                        | 0.158                                    |
| CD4+ central memory Th2   | 23.75±18.97                  | 35.86±19.37              | 38.98±16.00                  | 0.042*                               | 0.01*                                        | 0.621                                    |
| CD4+ central memory Th17  | 14.54±7.76                   | 13.97±8.49               | 17.73±7.69                   | 0.815                                | 0.178                                        | 0.113                                    |
| CD4+ effector memory      | 3.49±4.91                    | 1.34±1.89                | 1.13±1.31                    | 0.241                                | 0.229                                        | 0.986                                    |
| CD4+ effector memory Th1  | 16.14±15.65                  | 9.70±8.58                | 10.0±9.88                    | 0.399                                | 0.355                                        | 0.956                                    |
| CD4+ effector memory Th2  | 9.80±10.50                   | 22.73±16.52              | 18.68±11.81                  | 0.002**                              | 0.009**                                      | 0.483                                    |
| CD4+ effector memory Th17 | 11.95±8.42                   | 14.39±13.15              | 22.03±16.98                  | 0.573                                | 0.018*                                       | 0.067                                    |

|                      |           |           |           |       |       |        |
|----------------------|-----------|-----------|-----------|-------|-------|--------|
| CD8+ central memory  | 2.78±1.59 | 2.33±2.18 | 3.72±2.15 | 0.478 | 0.127 | 0.025* |
| CD8+ effector memory | 5.70±8.79 | 1.66±4.18 | 1.56±2.93 | 0.421 | 0.347 | 0.914  |



**Supplementary Table 7: Duodenal T cell populations in FD patients with and without concomitant IBS (%)**

|                                | Control<br>(mean±SD) | FD IBS <sup>-ve</sup><br>(mean±SD) | FD IBS <sup>+ve</sup><br>(mean±SD) | Control vs. FD IBS <sup>-ve</sup><br>( <i>p</i> value) | Control vs. FD IBS <sup>+ve</sup><br>( <i>p</i> value) | FD IBS <sup>-ve</sup> vs. FD IBS <sup>+ve</sup><br>( <i>p</i> value) |
|--------------------------------|----------------------|------------------------------------|------------------------------------|--------------------------------------------------------|--------------------------------------------------------|----------------------------------------------------------------------|
|                                | n=23                 | n=34                               | n=15                               |                                                        |                                                        |                                                                      |
| CD3+                           | 39.30±10.69          | 40.56±14.20                        | 45.29±15.14                        | 0.729                                                  | 0.183                                                  | 0.259                                                                |
| CD4+                           | 32.57±11.12          | 28.41±14.89                        | 29.73±11.45                        | 0.261                                                  | 0.543                                                  | 0.769                                                                |
| CD8+                           | 25.67±16.05          | 18.81±11.42                        | 17.83±9.64                         | 0.064                                                  | 0.096                                                  | 0.826                                                                |
| CD4+ effector                  | 2.06±2.17            | 3.68±2.76                          | 4.52±3.28                          | 0.024*                                                 | 0.010*                                                 | 0.437                                                                |
| CD4+ effector Th1-like         | 7.90±13.22           | 1.87±4.15                          | 1.28±2.62                          | 0.165                                                  | 0.251                                                  | 0.994                                                                |
| CD4+ effector Th2-like         | 13.03±16.11          | 19.03±16.80                        | 21.67±12.42                        | 0.098                                                  | 0.035*                                                 | 0.417                                                                |
| CD4+ effector Th17-like        | 31.74±24.72          | 46.33±24.69                        | 43.84±22.19                        | 0.029*                                                 | 0.137                                                  | 0.741                                                                |
| CD4+ naïve                     | 1.18±1.08            | 1.63±1.43                          | 2.29±2.51                          | 0.201                                                  | 0.076                                                  | 0.425                                                                |
| CD8+ effector                  | 2.15±3.95            | 1.30±4.19                          | 0.79±0.61                          | 0.026*                                                 | 0.204                                                  | 0.523                                                                |
| CD8+ naïve                     | 1.11±1.00            | 1.16±0.99                          | 1.20±0.67                          | 0.689                                                  | 0.291                                                  | 0.434                                                                |
| CD4+ central memory            | 3.35±2.68            | 2.37±1.66                          | 2.229±1.55                         | 0.083                                                  | 0.132                                                  | 0.909                                                                |
| CD4+ central memory Th1-like   | 17.14±19.76          | 8.12±10.13                         | 5.76±6.85                          | 0.162                                                  | 0.119                                                  | 0.659                                                                |
| CD4+ central memory Th2-like   | 23.75±18.97          | 37.20±17.73                        | 38.23±17.72                        | 0.014*                                                 | 0.038*                                                 | 0.941                                                                |
| CD4+ central memory Th17-like  | 14.54±7.76           | 17.81±9.96                         | 14.04±7.40                         | 0.182                                                  | 0.867                                                  | 0.174                                                                |
| CD4+ effector memory           | 3.49±4.91            | 1.09±1.47                          | 1.20±1.35                          | 0.134                                                  | 0.384                                                  | 0.724                                                                |
| CD4+ effector memory Th1-like  | 16.14±15.65          | 10.41±8.96                         | 6.58±6.30                          | 0.510                                                  | 0.100                                                  | 0.232                                                                |
| CD4+ effector memory Th2-like  | 9.80±10.50           | 17.85±11.50                        | 26.45±17.76                        | 0.023*                                                 | 0.000***                                               | 0.034*                                                               |
| CD4+ effector memory Th17-like | 11.95±8.41           | 18.52±15.62                        | 18.28±16.21                        | 0.090                                                  | 0.180                                                  | 0.956                                                                |

|                      |           |           |           |       |       |       |
|----------------------|-----------|-----------|-----------|-------|-------|-------|
| CD8+ central memory  | 2.78±1.59 | 3.10±2.38 | 3.03±2.00 | 0.577 | 0.718 | 0.916 |
| CD8+ effector memory | 5.70±8.79 | 2.17±4.74 | 0.70±0.68 | 0.449 | 0.282 | 0.618 |

**Supplementary Table 8: Peripheral T cell populations in FD patients with and without concomitant IBS (%)**

|                                | Control<br>(mean±SD) | FD IBS <sup>-ve</sup><br>(mean±SD) | FD IBS <sup>+ve</sup><br>(mean±SD) | Control vs. FD IBS <sup>-ve</sup><br>( <i>p</i> value) | Control vs. FD IBS <sup>+ve</sup><br>( <i>p</i> value) | FD IBS <sup>-ve</sup> vs. FD IBS <sup>+ve</sup><br>( <i>p</i> value) |
|--------------------------------|----------------------|------------------------------------|------------------------------------|--------------------------------------------------------|--------------------------------------------------------|----------------------------------------------------------------------|
|                                | n=37                 | n=33                               | n=28                               |                                                        |                                                        |                                                                      |
| CD3+                           | 41.13±13.70          | 48.44±26.06                        | 47.31±10.87                        | 0.101                                                  | 0.184                                                  | 0.811                                                                |
| CD4+                           | 45.63±18.70          | 40.51±17.89                        | 47.23±13.26                        | 0.220                                                  | 0.708                                                  | 0.133                                                                |
| CD8+                           | 23.21±15.15          | 18.25±14.53                        | 22.99±14.96                        | 0.311                                                  | 0.880                                                  | 0.283                                                                |
| CD4+ effector                  | 1.59±2.07            | 1.28±1.73                          | 1.62±1.49                          | 0.466                                                  | 0.298                                                  | 0.091                                                                |
| CD4+ effector Th1-like         | 24.13±24.16          | 9.71±12.10                         | 17.85±14.84                        | 0.007**                                                | 0.774                                                  | 0.026*                                                               |
| CD4+ effector Th2-like         | 16.20±12.34          | 20.35±16.80                        | 14.11±8.57                         | 0.401                                                  | 0.637                                                  | 0.217                                                                |
| CD4+ effector Th17-like        | 4.93±6.59            | 9.14±10.90                         | 2.97±2.83                          | 0.229                                                  | 0.688                                                  | 0.131                                                                |
| CD4+ naïve                     | 15.35±12.94          | 17.26±13.90                        | 18.00±13.90                        | 0.557                                                  | 0.438                                                  | 0.834                                                                |
| CD8+ effector                  | 6.07±6.24            | 2.10±3.25                          | 3.28±3.00                          | 0.003**                                                | 0.400                                                  | 0.048*                                                               |
| CD8+ naïve                     | 5.06±4.24            | 7.95±7.40                          | 7.34±7.80                          | 0.161                                                  | 0.319                                                  | 0.731                                                                |
| CD4+ central memory            | 9.40±6.68            | 10.48±9.91                         | 13.78±9.68                         | 0.613                                                  | 0.050                                                  | 0.149                                                                |
| CD4+ central memory Th1-like   | 9.63±6.44            | 15.17±11.12                        | 15.80±11.36                        | 0.057                                                  | 0.029*                                                 | 0.721                                                                |
| CD4+ central memory Th2-like   | 11.79±7.12           | 16.35±13.34                        | 11.64±7.78                         | 0.349                                                  | 0.731                                                  | 0.224                                                                |
| CD4+ central memory Th17-like  | 31.90±19.01          | 16.70±17.09                        | 25.19±20.08                        | 0.005**                                                | 0.244                                                  | 0.146                                                                |
| CD4+ effector memory           | 4.13±4.06            | 2.03±2.57                          | 4.11±3.65                          | 0.043*                                                 | 0.872                                                  | 0.035*                                                               |
| CD4+ effector memory Th1-like  | 27.84±18.22          | 19.25±15.26                        | 30.35±14.85                        | 0.031*                                                 | 0.541                                                  | 0.009**                                                              |
| CD4+ effector memory Th2-like  | 12.71±10.86          | 8.05±9.85                          | 11.23±8.65                         | 0.041*                                                 | 0.774                                                  | 0.104                                                                |
| CD4+ effector memory Th17-like | 4.70±3.87            | 2.87±3.83                          | 5.22±5.01                          | 0.062                                                  | 0.807                                                  | 0.047*                                                               |

|                      |           |            |           |       |       |       |
|----------------------|-----------|------------|-----------|-------|-------|-------|
| CD8+ central memory  | 2.20±2.08 | 2.29±2.31  | 2.46±2.17 | 0.995 | 0.679 | 0.700 |
| CD8+ effector memory | 1.67±1.54 | 0.963±1.23 | 1.99±1.99 | 0.108 | 0.678 | 0.055 |

**Supplementary Table 9: Duodenal T cell populations in FD patients and controls taking proton pump inhibitors (%)**

|                                | Control<br>(mean±SD) | FD PPI <sup>-ve</sup><br>(mean±SD) | FD PPI <sup>+ve</sup><br>(mean±SD) | Control vs. FD PPI <sup>-ve</sup><br>( <i>p</i> value) | Control vs. FD PPI <sup>+ve</sup><br>( <i>p</i> value) | FD PPI <sup>-ve</sup> vs. FD<br>PPI <sup>+ve</sup> ( <i>p</i> value) |
|--------------------------------|----------------------|------------------------------------|------------------------------------|--------------------------------------------------------|--------------------------------------------------------|----------------------------------------------------------------------|
|                                | n=24                 | n=21                               | n=19                               |                                                        |                                                        |                                                                      |
| CD3+                           | 38.90±10.64          | 43.16±14.64                        | 43.74±13.41                        | 0.273                                                  | 0.226                                                  | 0.888                                                                |
| CD4+                           | 32.46±10.88          | 27.84±13.09                        | 29.87±16.38                        | 0.281                                                  | 0.536                                                  | 0.657                                                                |
| CD8+                           | 25.83±15.72          | 17.01±10.21                        | 20.39±12.49                        | 0.042*                                                 | 0.200                                                  | 0.458                                                                |
| CD4+ effector                  | 1.99±2.15            | 4.17±3.08                          | 4.19±3.12                          | 0.011*                                                 | 0.013                                                  | 0.973                                                                |
| CD4+ effector Th1-like         | 7.90±13.22           | 0.87±2.15                          | 2.54±4.42                          | 0.043*                                                 | 0.769                                                  | 0.098                                                                |
| CD4+ effector Th2-like         | 13.08±15.75          | 24.78±16.68                        | 16.58±14.15                        | 0.010*                                                 | 0.300                                                  | 0.159                                                                |
| CD4+ effector Th17-like        | 31.02±24.43          | 44.33±21.84                        | 48.98±27.27                        | 0.074                                                  | 0.020*                                                 | 0.551                                                                |
| CD4+ naïve                     | 1.15±1.07            | 1.75±1.31                          | 2.68±2.82                          | 0.091                                                  | 0.29*                                                  | 0.589                                                                |
| CD8+ effector                  | 2.20±3.93            | 0.63±0.44                          | 0.67±0.55                          | 0.018*                                                 | 0.028*                                                 | 0.920                                                                |
| CD8+ naïve                     | 1.10±0.98            | 1.23±0.89                          | 1.47±1.30                          | 0.479                                                  | 0.251                                                  | 0.650                                                                |
| CD4+ central memory            | 3.31±2.62            | 2.18±1.66                          | 3.41±3.80                          | 0.182                                                  | 0.898                                                  | 0.259                                                                |
| CD4+ central memory Th1-like   | 17.35±19.35          | 4.63±5.31                          | 11.29±13.68                        | 0.039                                                  | 0.464                                                  | 0.211                                                                |
| CD4+ central memory Th2-like   | 23.19±18.75          | 39.73±17.62                        | 34.96±19.32                        | 0.008**                                                | 0.068                                                  | 0.465                                                                |
| CD4+ central memory Th17-like  | 14.97±7.86           | 19.94±8.49                         | 14.03±9.32                         | 0.050                                                  | 0.905                                                  | 0.047*                                                               |
| CD4+ effector memory           | 3.39±4.82            | 0.59±0.48                          | 1.71±2.05                          | 0.011*                                                 | 0.796                                                  | 0.034*                                                               |
| CD4+ effector memory Th1-like  | 16.61±15.47          | 8.94±9.35                          | 7.75±5.52                          | 0.161                                                  | 0.294                                                  | 0.965                                                                |
| CD4+ effector memory Th2-like  | 9.77±10.27           | 19.90±15.06                        | 22.98±14.44                        | 0.014*                                                 | 0.001**                                                | 0.395                                                                |
| CD4+ effector memory Th17-like | 13.36±10.65          | 23.22±18.25                        | 13.73±12.08                        | 0.080                                                  | 0.997                                                  | 0.095                                                                |

|                      |           |           |           |        |       |       |
|----------------------|-----------|-----------|-----------|--------|-------|-------|
| CD8+ central memory  | 2.80±1.55 | 2.92±2.58 | 3.42±2.07 | 0.850  | 0.352 | 0.462 |
| CD8+ effector memory | 6.28±9.06 | 0.48±0.57 | 2.39±4.66 | 0.032* | 0.730 | 0.100 |

**Supplementary Table 10: Peripheral T cell populations in FD patients and controls taking proton pump inhibitors (%)**

|                                | <b>Control<br/>(mean±SD)</b> | <b>FD PPI<sup>-ve</sup><br/>(mean±SD)</b> | <b>FD PPI<sup>+ve</sup><br/>(mean±SD)</b> | <b>Control vs. FD PPI<sup>-ve</sup><br/>(p value)</b> | <b>Control vs. FD PPI<sup>+ve</sup><br/>(p value)</b> | <b>FD PPI<sup>-ve</sup> vs. FD<br/>PPI<sup>+ve</sup> (p value)</b> |
|--------------------------------|------------------------------|-------------------------------------------|-------------------------------------------|-------------------------------------------------------|-------------------------------------------------------|--------------------------------------------------------------------|
|                                | n=37                         | n=37                                      | n=16                                      |                                                       |                                                       |                                                                    |
| CD3+                           | 41.13±13.70                  | 48.64±18.36                               | 49.90±26.42                               | 0.194                                                 | 0.023*                                                | 0.205                                                              |
| CD4+                           | 45.63±18.70                  | 46.16±16.19                               | 39.24±11.72                               | 0.891                                                 | 0.215                                                 | 0.181                                                              |
| CD8+                           | 23.21±15.15                  | 23.18±14.85                               | 19.00±14.82                               | 0.789                                                 | 0.506                                                 | 0.388                                                              |
| CD4+ effector                  | 1.59±2.07                    | 1.47±1.72                                 | 1.16±1.17                                 | 0.843                                                 | 0.603                                                 | 0.501                                                              |
| CD4+ effector Th1-like         | 24.13±24.16                  | 14.11±11.65                               | 10.40±14.13                               | 0.248                                                 | 0.026*                                                | 0.190                                                              |
| CD4+ effector Th2-like         | 16.20±12.34                  | 17.93±14.38                               | 17.92±13.60                               | 0.766                                                 | 0.553                                                 | 0.720                                                              |
| CD4+ effector Th17-like        | 4.93±6.59                    | 3.76±4.45                                 | 12.42±13.00                               | 0.792                                                 | 0.060                                                 | 0.037*                                                             |
| CD4+ naïve                     | 15.35±12.94                  | 19.60±13.46                               | 17.61±15.88                               | 0.186                                                 | 0.584                                                 | 0.628                                                              |
| CD8+ effector                  | 6.08±6.24                    | 3.31±3.76                                 | 2.54±3.76                                 | 0.129                                                 | 0.035*                                                | 0.359                                                              |
| CD8+ naïve                     | 5.06±4.24                    | 9.15±7.95                                 | 6.40±7.21                                 | 0.041*                                                | 0.745                                                 | 0.220                                                              |
| CD4+ central memory            | 9.40±6.68                    | 12.16±8.60                                | 16.51±14.81                               | 0.196                                                 | 0.123                                                 | 0.592                                                              |
| CD4+ central memory Th1-like   | 9.63±6.44                    | 16.78±11.78                               | 11.02±6.36                                | 0.001**                                               | 0.619                                                 | 0.041*                                                             |
| CD4+ central memory Th2-like   | 11.79±7.12                   | 11.42±6.90                                | 15.88±15.24                               | 0.860                                                 | 0.135                                                 | 0.103                                                              |
| CD4+ central memory Th17-like  | 31.90±19.01                  | 24.67±19.70                               | 13.47±16.29                               | 0.195                                                 | 0.005**                                               | 0.073                                                              |
| CD4+ effector memory           | 4.13±4.06                    | 3.72±3.52                                 | 1.66±2.11                                 | 0.957                                                 | 0.036*                                                | 0.039*                                                             |
| CD4+ effector memory Th1-like  | 27.84±18.22                  | 28.29±14.23                               | 15.59±15.31                               | 0.906                                                 | 0.013*                                                | 0.010*                                                             |
| CD4+ effector memory Th2-like  | 12.71±10.86                  | 10.93±8.04                                | 9.29±12.82                                | 0.457                                                 | 0.266                                                 | 0.596                                                              |
| CD4+ effector memory Th17-like | 4.70±3.87                    | 5.01±4.74                                 | 2.12±3.69                                 | 0.870                                                 | 0.026*                                                | 0.018*                                                             |

|                      |           |           |           |       |       |       |
|----------------------|-----------|-----------|-----------|-------|-------|-------|
| CD8+ central memory  | 2.20±2.08 | 2.42±2.11 | 2.98±2.60 | 0.693 | 0.303 | 0.469 |
| CD8+ effector memory | 1.67±1.54 | 1.73±1.88 | 0.88±1.05 | 0.901 | 0.193 | 0.225 |



**Supplementary Table 11: Duodenal T cell populations in FD patients and controls analysed by sex (%)**

|                               | Control (Female) (mean±SD) | Control (Male) (mean±SD) | FD (Female) (mean±SD) | FD (Male) (mean±SD) | Control female vs. Control male (p value) | Control female vs. FD female (p value) | Control female vs. FD male (p value) | Control male vs. FD female (p value) | Control male vs. FD male (p value) | FD female vs. FD male (p value) |
|-------------------------------|----------------------------|--------------------------|-----------------------|---------------------|-------------------------------------------|----------------------------------------|--------------------------------------|--------------------------------------|------------------------------------|---------------------------------|
|                               | n=11                       | n=12                     | n=37                  | n=11                |                                           |                                        |                                      |                                      |                                    |                                 |
| CD3+                          | 44.99±9.14                 | 36.24±6.25               | 42.91±15.45           | 39.04±11.73         | 0.120                                     | 0.643                                  | 0.287                                | 0.140                                | 0.616                              | 0.390                           |
| CD4+                          | 30.85±11.15                | 34.13±11.34              | 29.97±13.98           | 25.74±13.54         | 0.548                                     | 0.848                                  | 0.360                                | 0.354                                | 0.127                              | 0.361                           |
| CD8+                          | 22.76±15.63                | 28.34±16.64              | 19.25±12.41           | 16.55±3.99          | 0.572                                     | 0.407                                  | 0.406                                | 0.122                                | 0.158                              | 0.861                           |
| CD4+ effector                 | 2.52±2.46                  | 1.20±0.99                | 4.27±3.57             | 3.73±2.21           | 0.225                                     | 0.152                                  | 0.223                                | 0.002**                              | 0.013*                             | 0.949                           |
| CD4+ effector Th1-like        | 4.31±10.51                 | 7.52±9.67                | 1.69±3.72             | 0.70±1.48           | 0.293                                     | 0.834                                  | 0.731                                | 0.121                                | 0.161                              | 0.825                           |
| CD4+ effector Th2-like        | 11.66±9.95                 | 14.28±20.62              | 21.53±15.47           | 14.03±15.68         | 0.692                                     | 0.073                                  | 0.726                                | 0.172                                | 0.969                              | 0.171                           |
| CD4+ effector Th17-like       | 44.07±28.25                | 20.44±14.32              | 45.15±24.39           | 46.21±23.63         | 0.019*                                    | 0.894                                  | 0.832                                | 0.002**                              | 0.011*                             | 0.896                           |
| CD4+ naïve                    | 1.57±1.30                  | 0.63±0.35                | 1.92±2.02             | 2.07±2.37           | 0.074                                     | 0.777                                  | 0.742                                | 0.0126*                              | 0.038*                             | 0.900                           |
| CD8+ effector                 | 0.96±0.84                  | 4.89±7.41                | 1.29±4.02             | 0.73±0.38           | 0.143                                     | 0.293                                  | 0.908                                | 0.004**                              | 0.114                              | 0.363                           |
| CD8+ naïve                    | 1.49±1.32                  | 0.75±0.36                | 1.49±2.06             | 1.07±0.62           | 0.180                                     | 0.780                                  | 0.820                                | 0.162                                | 0.282                              | 0.992                           |
| CD4+ central memory           | 2.40±2.01                  | 4.14±2.98                | 2.62±2.96             | 2.60±1.50           | 0.172                                     | 0.987                                  | 0.591                                | 0.083                                | 0.402                              | 0.506                           |
| CD4+ central memory Th1-like  | 47.10±7.41                 | 25.93±21.89              | 8.15±9.71             | 3.25±1.95           | 0.004**                                   | 0.344                                  | 0.663                                | 0.006**                              | 0.014*                             | 0.689                           |
| CD4+ central memory Th2-like  | 27.20±20.82                | 20.59±17.39              | 36.92±18.32           | 38.90±16.14         | 0.390                                     | 0.126                                  | 0.138                                | 0.009**                              | 0.019*                             | 0.753                           |
| CD4+ central memory Th17-like | 15.83±8.99                 | 11.66±2.79               | 16.56±10.20           | 17.73±3.54          | 0.266                                     | 0.812                                  | 0.619                                | 0.099                                | 0.107                              | 0.701                           |
| CD4+ effector memory          | 0.78±1.02                  | 4.77±5.14                | 1.08±1.33             | 1.13±0.79           | 0.004**                                   | 0.383                                  | 0.209                                | 0.006**                              | 0.117                              | 0.486                           |

|                                |             |             |             |             |        |         |         |        |        |       |
|--------------------------------|-------------|-------------|-------------|-------------|--------|---------|---------|--------|--------|-------|
| CD4+ effector memory Th1-like  | 12.37±14.90 | 19.60±16.15 | 9.88±10.42  | 8.91±2.08   | 0.197  | 0.900   | 0.662   | 0.080  | 0.417  | 0.512 |
| CD4+ effector memory Th2-like  | 7.15±8.33   | 12.23±11.99 | 20.10±15.98 | 20.80±5.47  | 0.300  | 0.005** | 0.002** | 0.115  | 0.035* | 0.301 |
| CD4+ effector memory Th17-like | 10.84±10.75 | 13.06±5.52  | 18.18±15.46 | 19.11±17.62 | 0.516  | 0.165   | 0.244   | 0.562  | 0.607  | 0.954 |
| CD8+ central memory            | 2.57±1.77   | 2.95±1.47   | 2.97±2.38   | 3.08±1.57   | 0.666  | 0.587   | 0.573   | 0.978  | 0.883  | 0.880 |
| CD8+ effector memory           | 0.98±1.80   | 7.63±8.66   | 2.25±4.96   | 1.29±1.35   | 0.013* | 0.294   | 0.139   | 0.039* | 0.319  | 0.430 |

**Supplementary Table 12: Peripheral T cell populations in FD patients and controls analysed by sex (%)**

|                               | <b>Control<br/>(Female)<br/>(mean±SD)</b> | <b>Control<br/>(Male)<br/>(mean±SD)</b> | <b>FD<br/>(Female)<br/>(mean±SD)</b> | <b>FD (Male)<br/>(mean±SD)</b> | <b>Control<br/>female<br/>vs.<br/>Control<br/>male<br/>(p value)</b> | <b>Control<br/>female<br/>vs. FD<br/>female<br/>(p value)</b> | <b>Control<br/>female<br/>vs. FD<br/>male<br/>(p value)</b> | <b>Control<br/>male vs.<br/>FD<br/>female<br/>(p value)</b> | <b>Control<br/>male vs.<br/>FD<br/>male<br/>(p value)</b> | <b>FD<br/>female<br/>vs. FD<br/>male<br/>(p value)</b> |
|-------------------------------|-------------------------------------------|-----------------------------------------|--------------------------------------|--------------------------------|----------------------------------------------------------------------|---------------------------------------------------------------|-------------------------------------------------------------|-------------------------------------------------------------|-----------------------------------------------------------|--------------------------------------------------------|
|                               | n=19                                      | n=18                                    | n=42                                 | n=19                           |                                                                      |                                                               |                                                             |                                                             |                                                           |                                                        |
| CD3+                          | 42.83±12.02                               | 39.44±15.36                             | 48.83±20.89                          | 45.90±19.64                    | 0.887                                                                | 0.198                                                         | 0.436                                                       | 0.146                                                       | 0.356                                                     | 0.701                                                  |
| CD4+                          | 42.87±20.56                               | 48.54±16.60                             | 44.11±16.89                          | 42.76±14.50                    | 0.319                                                                | 0.795                                                         | 0.985                                                       | 0.365                                                       | 0.317                                                     | 0.782                                                  |
| CD8+                          | 17.96±12.36                               | 28.76±16.15                             | 17.35±13.81                          | 28.08±14.71                    | 0.033*                                                               | 0.932                                                         | 0.035*                                                      | 0.018*                                                      | 0.970                                                     | 0.020*                                                 |
| CD4+ effector                 | 2.17±2.84                                 | 1.04±0.96                               | 1.531±1.53                           | 1.22±1.85                      | 0.420                                                                | 0.961                                                         | 0.347                                                       | 0.375                                                       | 0.907                                                     | 0.396                                                  |
| CD4+ effector Th1-like        | 26.44±27.82                               | 18.19±13.97                             | 12.18±11.68                          | 16.23±18.01                    | 0.930                                                                | 0.193                                                         | 0.409                                                       | 0.176                                                       | 0.373                                                     | 0.740                                                  |
| CD4+ effector Th2-like        | 12.80±9.32                                | 17.82±12.66                             | 17.96±13.25                          | 15.11±10.86                    | 0.254                                                                | 0.190                                                         | 0.753                                                       | 0.975                                                       | 0.409                                                     | 0.347                                                  |
| CD4+ effector Th17-like       | 4.95±7.32                                 | 3.71±3.225                              | 5.33±8.11                            | 8.60±10.02                     | 0.580                                                                | 0.708                                                         | 0.088                                                       | 0.779                                                       | 0.263                                                     | 0.102                                                  |
| CD4+ naïve                    | 14.44±13.40                               | 16.32±12.75                             | 19.72±14.92                          | 11.32±6.92                     | 0.663                                                                | 0.148                                                         | 0.470                                                       | 0.358                                                       | 0.254                                                     | 0.025*                                                 |
| CD8+ effector                 | 4.14±4.44                                 | 7.19±6.68                               | 2.29±2.82                            | 4.15±4.67                      | 0.162                                                                | 0.255                                                         | 0.749                                                       | 0.005**                                                     | 0.280                                                     | 0.129                                                  |
| CD8+ naïve                    | 4.71±4.68                                 | 5.44±3.82                               | 7.40±7.23                            | 8.68±8.27                      | 0.393                                                                | 0.167                                                         | 0.095                                                       | 0.716                                                       | 0.427                                                     | 0.568                                                  |
| CD4+ central memory           | 9.35±6.96                                 | 9.47±6.55                               | 13.18±11.56                          | 11.32±8.91                     | 0.960                                                                | 0.390                                                         | 0.470                                                       | 0.375                                                       | 0.451                                                     | 0.992                                                  |
| CD4+ central memory Th1-like  | 9.79±7.43                                 | 9.46±5.50                               | 17.44±11.78                          | 9.656±5.52                     | 0.914                                                                | 0.004**                                                       | 0.964                                                       | 0.003**                                                     | 0.964                                                     | 0.003**                                                |
| CD4+ central memory Th2-like  | 12.88±8.68                                | 10.57±4.82                              | 15.76±12.08                          | 10.70±8.65                     | 0.544                                                                | 0.636                                                         | 0.306                                                       | 0.246                                                       | 0.700                                                     | 0.094                                                  |
| CD4+ central memory Th17-like | 30.26±19.23                               | 33.63±19.17                             | 16.46±17.09                          | 29.75±19.78                    | 0.580                                                                | 0.008**                                                       | 0.932                                                       | 0.001**                                                     | 0.524                                                     | 0.011*                                                 |
| CD4+ effector memory          | 3.22±4.18                                 | 5.05±3.83                               | 2.45±2.69                            | 4.81±4.65                      | 0.102                                                                | 0.760                                                         | 0.218                                                       | 0.025*                                                      | 0.671                                                     | 0.076                                                  |
| CD4+ effector memory Th1-like | 28.83±19.00                               | 26.80±17.85                             | 24.81±15.77                          | 23.33±16.75                    | 0.717                                                                | 0.394                                                         | 0.321                                                       | 0.679                                                       | 0.536                                                     | 0.753                                                  |

|                                |             |             |           |             |       |       |       |        |       |        |
|--------------------------------|-------------|-------------|-----------|-------------|-------|-------|-------|--------|-------|--------|
| CD4+ effector memory Th2-like  | 11.72±10.95 | 13.76±10.98 | 9.31±8.98 | 10.05±10.46 | 0.537 | 0.389 | 0.615 | 0.119  | 0.270 | 0.795  |
| CD4+ effector memory Th17-like | 3.90±3.86   | 5.59±3.81   | 3.37±3.37 | 5.35±5.56   | 0.204 | 0.686 | 0.509 | 0.062  | 0.541 | 0.243  |
| CD8+ central memory            | 1.89±1.84   | 2.07±1.46   | 2.49±2.44 | 2.11±1.72   | 0.607 | 0.512 | 0.581 | 0.970  | 0.982 | 0.991  |
| CD8+ effector memory           | 1.00±0.89   | 2.21±1.73   | 1.06±1.34 | 2.24±2.05   | 0.063 | 0.941 | 0.057 | 0.024* | 0.993 | 0.019* |

**Supplementary Table 13: Spearman's r correlations between HADS anxiety score and duodenal mucosal lymphocyte populations**

|                          | Control (n=12)  |                         |         | FD (n=37) |                         |         |
|--------------------------|-----------------|-------------------------|---------|-----------|-------------------------|---------|
|                          | r               | 95% confidence interval | p value | r         | 95% confidence interval | p value |
| CD4                      | 0.1168          | -0.5045 to 0.6584       | 0.7163  | 0.1829    | -0.1874 to 0.5078       | 0.3163  |
| CD8                      | -0.1274         | -0.6645 to 0.4964       | 0.6911  | 0.1896    | -0.1808 to 0.5129       | 0.2987  |
| CD4 effector             | -0.01062        | -0.5936 to 0.5797       | 0.9779  | 0.1554    | -0.1872 to 0.4643       | 0.3584  |
| CD4 effector Th1         | Horizontal line |                         |         | 0.03577   | -0.3007 to 0.3643       | 0.8335  |
| CD4 effector Th2         | -0.4752         | -0.8304 to 0.1546       | 0.1194  | -0.07616  | -0.3989 to 0.2634       | 0.6541  |
| CD4 effector Th17        | 0.1876          | -0.4485 to 0.6975       | 0.5558  | -0.1487   | -0.4589 to 0.1938       | 0.3797  |
| CD4 naive                | -0.2797         | -0.7443 to 0.3673       | 0.3749  | 0.1994    | -0.1430 to 0.4992       | 0.2367  |
| CD8 effector             | -0.4567         | -0.8229 to 0.1776       | 0.1367  | 0.4063    | 0.08487 to 0.6511       | 0.0126* |
| CD8 naive                | -0.2443         | -0.7268 to 0.3997       | 0.4403  | 0.1755    | -0.1672 to 0.4803       | 0.2989  |
| CD4 central memory       | 0.06217         | -0.5444 to 0.6260       | 0.8468  | 0.2191    | -0.1227 to 0.5145       | 0.1926  |
| CD4 central memory Th1   | -0.191          | -0.6993 to 0.4457       | 0.5455  | 0.1461    | -0.1964 to 0.4567       | 0.3883  |
| CD4 central memory Th2   | -0.1735         | -0.6900 to 0.4601       | 0.5865  | -0.07478  | -0.3978 to 0.2647       | 0.66    |
| CD4 central memory Th17  | -0.2726         | -0.7408 to 0.3739       | 0.3876  | -0.02725  | -0.3569 to 0.3084       | 0.8728  |
| CD4 effector memory      | -0.4            | -0.7992 to 0.2439       | 0.1968  | 0.0316    | -0.3045 to 0.3607       | 0.8527  |
| CD4 effector memory Th1  | -0.1946         | -0.7012 to 0.4427       | 0.5396  | -0.272    | -0.5547 to 0.06692      | 0.1034  |
| CD4 effector memory Th2  | -0.4991         | -0.8399 to 0.1239       | 0.1009  | 0.3164    | -0.01844 to 0.5874      | 0.0564  |
| CD4 effector memory Th17 | -0.3812         | -0.7910 to 0.2647       | 0.2187  | 0.3716    | 0.04422 to 0.6270       | 0.0235* |
| CD8 central memory       | 0.03369         | -0.5642 to 0.6084       | 0.9177  | 0.2056    | -0.1366 to 0.5040       | 0.2222  |
| CD8 effector memory      | -0.1826         | -0.6949 to 0.4526       | 0.5645  | -0.04361  | -0.3711 to 0.2935       | 0.7977  |

**Supplementary Table14: Spearman's r correlations between HADS depression score and duodenal mucosal lymphocyte populations**

|                          | Control (n=12)  |                         |                | FD (n=37) |                         |                |
|--------------------------|-----------------|-------------------------|----------------|-----------|-------------------------|----------------|
|                          | r               | 95% confidence interval | P (two-tailed) | r         | 95% confidence interval | P (two-tailed) |
| CD4                      | 0.06714         | -0.5409 to 0.6291       | 0.8366         | 0.1521    | -0.2179 to 0.4838       | 0.4061         |
| CD8                      | 0.09895         | -0.5178 to 0.6480       | 0.7593         | 0.1791    | -0.1913 to 0.5048       | 0.3268         |
| CD4 effector             | 0.04947         | -0.5533 to 0.6182       | 0.8807         | 0.1394    | -0.2029 to 0.4514       | 0.4104         |
| CD4 effector Th1         | Horizontal line |                         |                | -0.0873   | -0.4083 to 0.2529       | 0.6074         |
| CD4 effector Th2         | -0.6337         | -0.8896 to -0.07472     | 0.0305*        | -0.0904   | -0.4109 to 0.2500       | 0.5947         |
| CD4 effector Th17        | 0.2686          | -0.3777 to 0.7389       | 0.395          | -0.07657  | -0.3993 to 0.2630       | 0.6524         |
| CD4 naive                | -0.1307         | -0.6663 to 0.4938       | 0.6837         | 0.1795    | -0.1631 to 0.4835       | 0.2877         |
| CD8 effector             | -0.2226         | -0.7158 to 0.4188       | 0.4828         | 0.2029    | -0.1394 to 0.5019       | 0.2285         |
| CD8 naive                | -0.06361        | -0.6269 to 0.5434       | 0.8456         | 0.181     | -0.1616 to 0.4847       | 0.2836         |
| CD4 central memory       | -0.06915        | -0.6303 to 0.5394       | 0.8297         | 0.2031    | -0.1392 to 0.5021       | 0.2279         |
| CD4 central memory Th1   | -0.3471         | -0.7758 to 0.3009       | 0.2644         | 0.1164    | -0.2252 to 0.4325       | 0.4927         |
| CD4 central memory Th2   | -0.1166         | -0.6583 to 0.5046       | 0.7168         | -0.05079  | -0.3773 to 0.2869       | 0.7653         |
| CD4 central memory Th17  | -0.08834        | -0.6418 to 0.5256       | 0.7848         | 0.09736   | -0.2434 to 0.4167       | 0.5665         |
| CD4 effector memory      | -0.6431         | -0.8929 to -0.09064     | 0.0278*        | 0.02037   | -0.3146 to 0.3509       | 0.9047         |
| CD4 effector memory Th1  | -0.3628         | -0.7829 to 0.2845       | 0.2438         | 0.0628    | -0.2758 to 0.3876       | 0.7119         |
| CD4 effector memory Th2  | -0.3559         | -0.7798 to 0.2918       | 0.2535         | 0.2095    | -0.1326 to 0.5070       | 0.2134         |
| CD4 effector memory Th17 | -0.2212         | -0.7151 to 0.4200       | 0.4836         | 0.2793    | -0.05904 to 0.5601      | 0.0941         |
| CD8 central memory       | -0.06018        | -0.6248 to 0.5458       | 0.8518         | 0.2187    | -0.1231 to 0.5142       | 0.1934         |
| CD8 effector memory      | -0.2814         | -0.7451 to 0.3657       | 0.3701         | 0.0053    | -0.3282 to 0.3376       | 0.9752         |

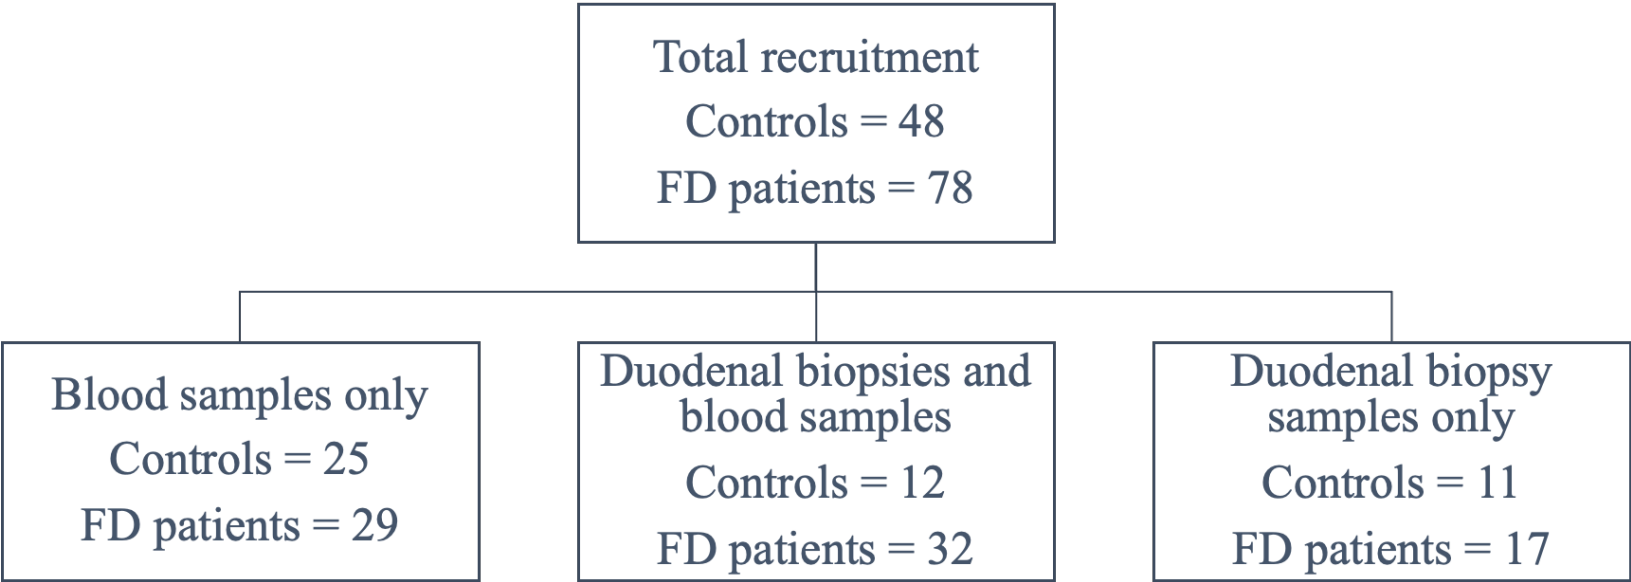

**Supplementary Figure 1: Flow chart for recruitment and collection of samples from FD patients and outpatient controls.**

In total, 48 controls and 78 FD patients were recruited for this study. Within this cohort, there were a total of 37 control and 61 FD patient PBMC samples; and 23 control and 49 FD LPMC samples available for analysis. Of the total participants recruited 12 controls (32.43% of total PBMCs, 52.17% of total LPMCs) and 32 FD patients (52.46% of total PMBCs, 65.31% of total LPMCs) donated both blood and biopsies for isolations of immune cells for analysis, while duodenal biopsies only were available for 11 controls and 17 FD patients. 25 controls and 29 FD patients donated blood samples only, without biopsies for cellular isolations.



A

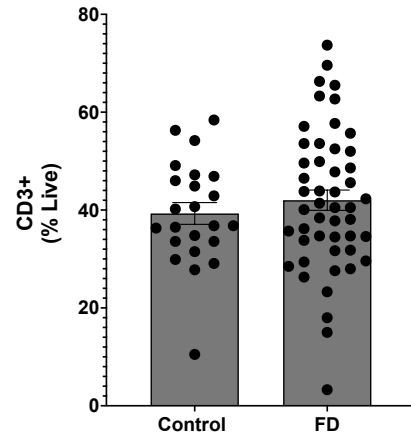

B

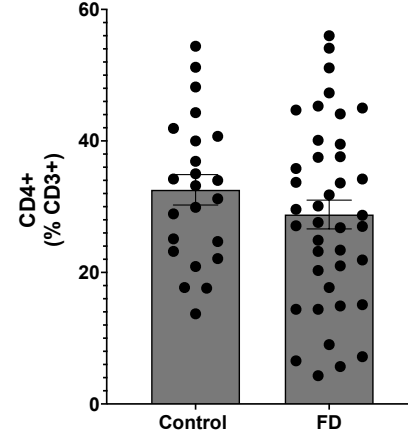

C

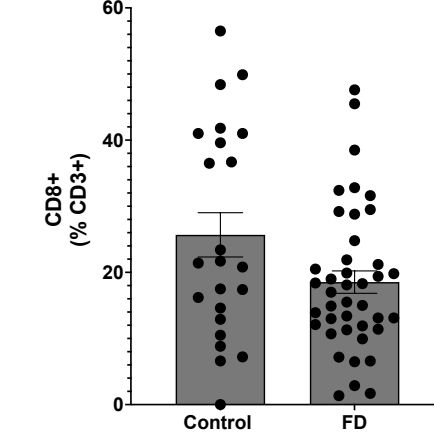

D

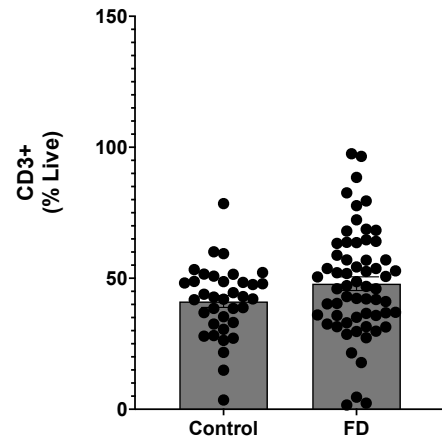

E

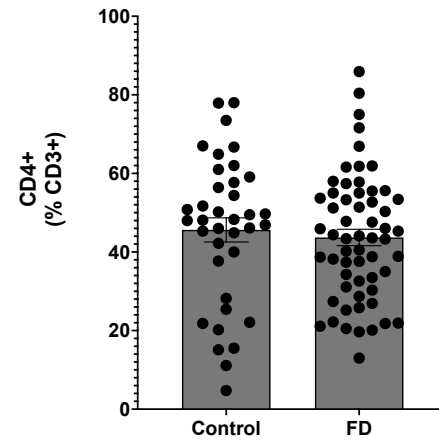

F

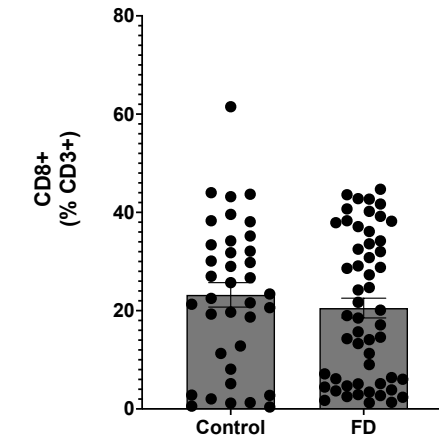

**Supplementary Figure 2: Duodenal and peripheral lymphocytes in functional dyspepsia.**

Lamina propria lymphocytes were isolated from duodenal biopsies and peripheral blood mononuclear cells were isolated from whole blood. Cells were phenotyped using flow cytometry. In the mucosal cells, (A) CD3<sup>+</sup>, (B) CD4<sup>+</sup> and (C) CD8<sup>+</sup> populations were investigated, along with the PBMC (D) CD3<sup>+</sup>, (E) CD4<sup>+</sup> and (F) CD8<sup>+</sup> populations in FD patients compared to controls. n=23 controls, n=49 FD for mucosal cells, n=37 controls, n=61 FD for PBMCs. Data presented as mean±SEM. Statistical analysis for control vs FD, (A,B,C,D,E) parametric t test, (F) non-parametric t test. \**p*<0.05.

A

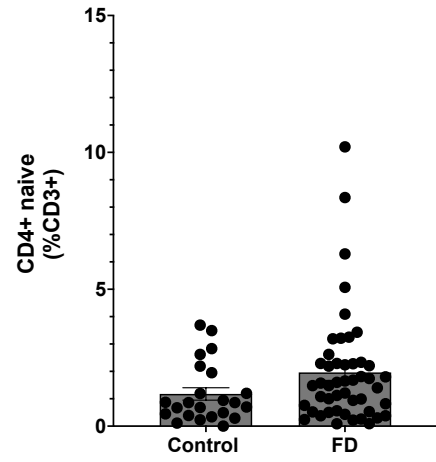

B

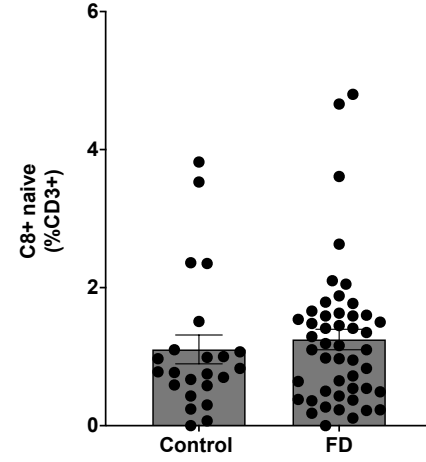

C

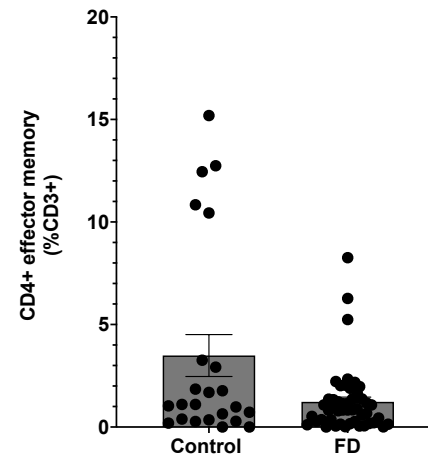

D

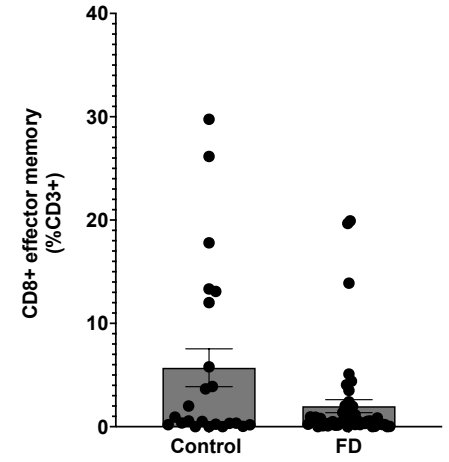

E

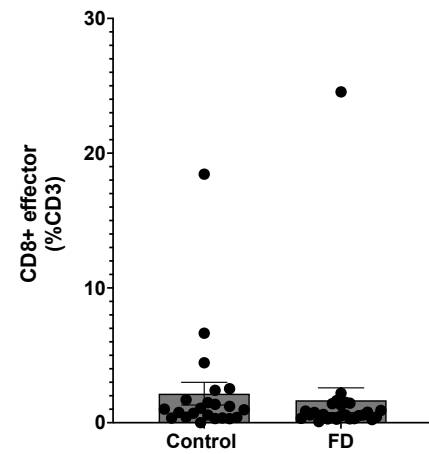

F

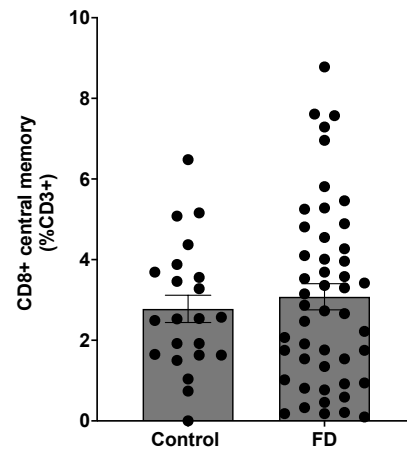

**Supplementary Figure 3: Duodenal and peripheral naïve and effector memory T cell populations in FD patients compared to controls.**

Lamina propria mononuclear cells were isolated from duodenal biopsies and phenotyped using surface marker staining and flow cytometry. (A) CD4<sup>+</sup> and (B) CD8<sup>+</sup> naïve (CD45RA<sup>+</sup> CCR7<sup>+</sup>), along with (C) CD4<sup>+</sup> and (D) CD8<sup>+</sup> effector memory (CD45RO<sup>+</sup> CCR7<sup>-</sup>) T cell populations were compared between controls and FD patients. The (E) CD8<sup>+</sup> effector and (F) CD8<sup>+</sup> central memory populations were also investigated within these groups. n=23 controls, n=49 FD. Data presented as mean±SEM. Statistical analysis for control vs FD, (F) parametric *t* test, (A,B,C,D,E) non-parametric *t* test.

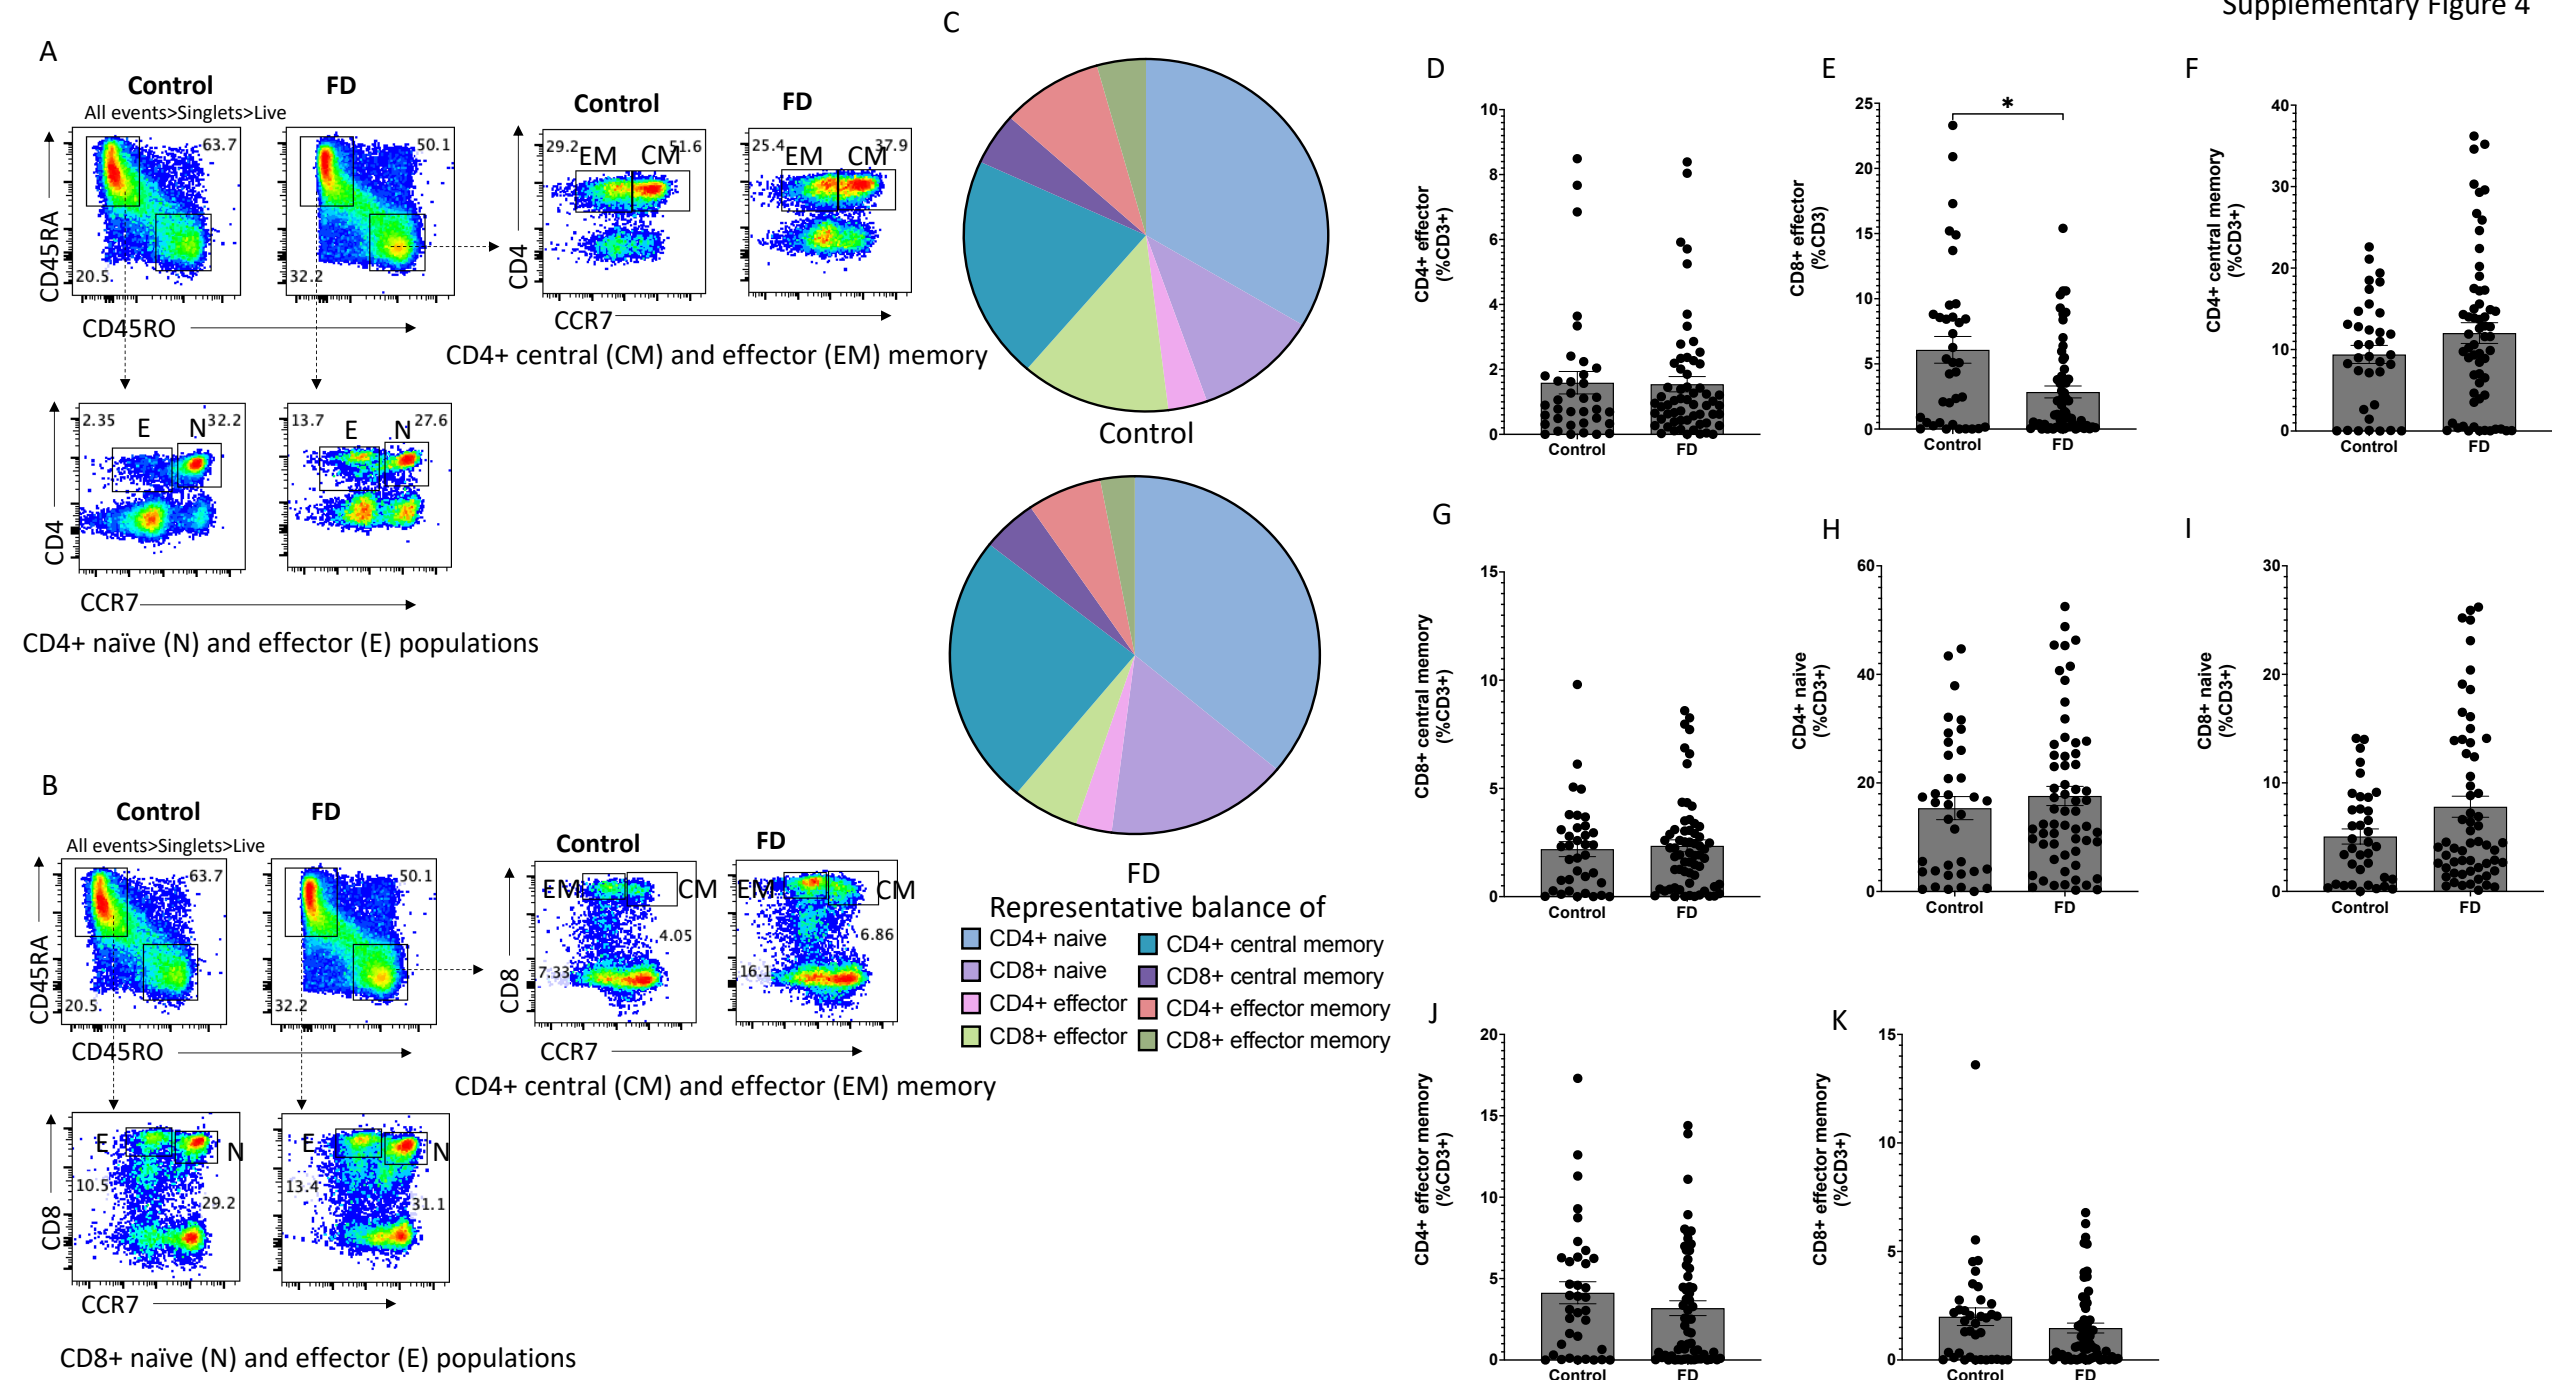

**Supplementary Figure 4: The peripheral effector and memory T cell balance in FD compared to controls.**

Peripheral blood mononuclear cells were isolated using density gradient centrifugation and phenotyped using surface marker staining and flow cytometry. Peripheral naïve (CD45RA<sup>+</sup> CCR7<sup>+</sup>), effector (CD45RA<sup>+</sup> CCR7<sup>-</sup>), central memory (CD45RO<sup>+</sup> CCR7<sup>+</sup>) and effector memory (CD45RO<sup>+</sup> CCR7<sup>-</sup>) T cells were identified in the (A) CD4<sup>+</sup> and (B) CD8<sup>+</sup> populations. (C) The balance of each effector and memory population was then represented within the control and FD cohorts before the (D) CD4<sup>+</sup> and (E) CD8<sup>+</sup> effector populations were compared between controls and FD. The (F) CD4<sup>+</sup> central memory and (G) CD8<sup>+</sup> central memory populations were also investigated within these groups, in addition to the (H) CD4<sup>+</sup> and (I) CD8<sup>+</sup> naïve (CD45RA<sup>+</sup> CCR7<sup>+</sup>), (J) CD4<sup>+</sup> and (K) CD8<sup>+</sup> effector memory (CD45RO<sup>+</sup> CCR7<sup>-</sup>) T cell populations in control and FD PBMCs.

n=37 controls, n=61 FD. Data presented as mean±SEM. Statistical analysis for control vs FD, (F) parametric t test, (D,E,G,H,I,J,K) non-parametric t test. \* $p < 0.05$ , \*\* $p < 0.01$ .

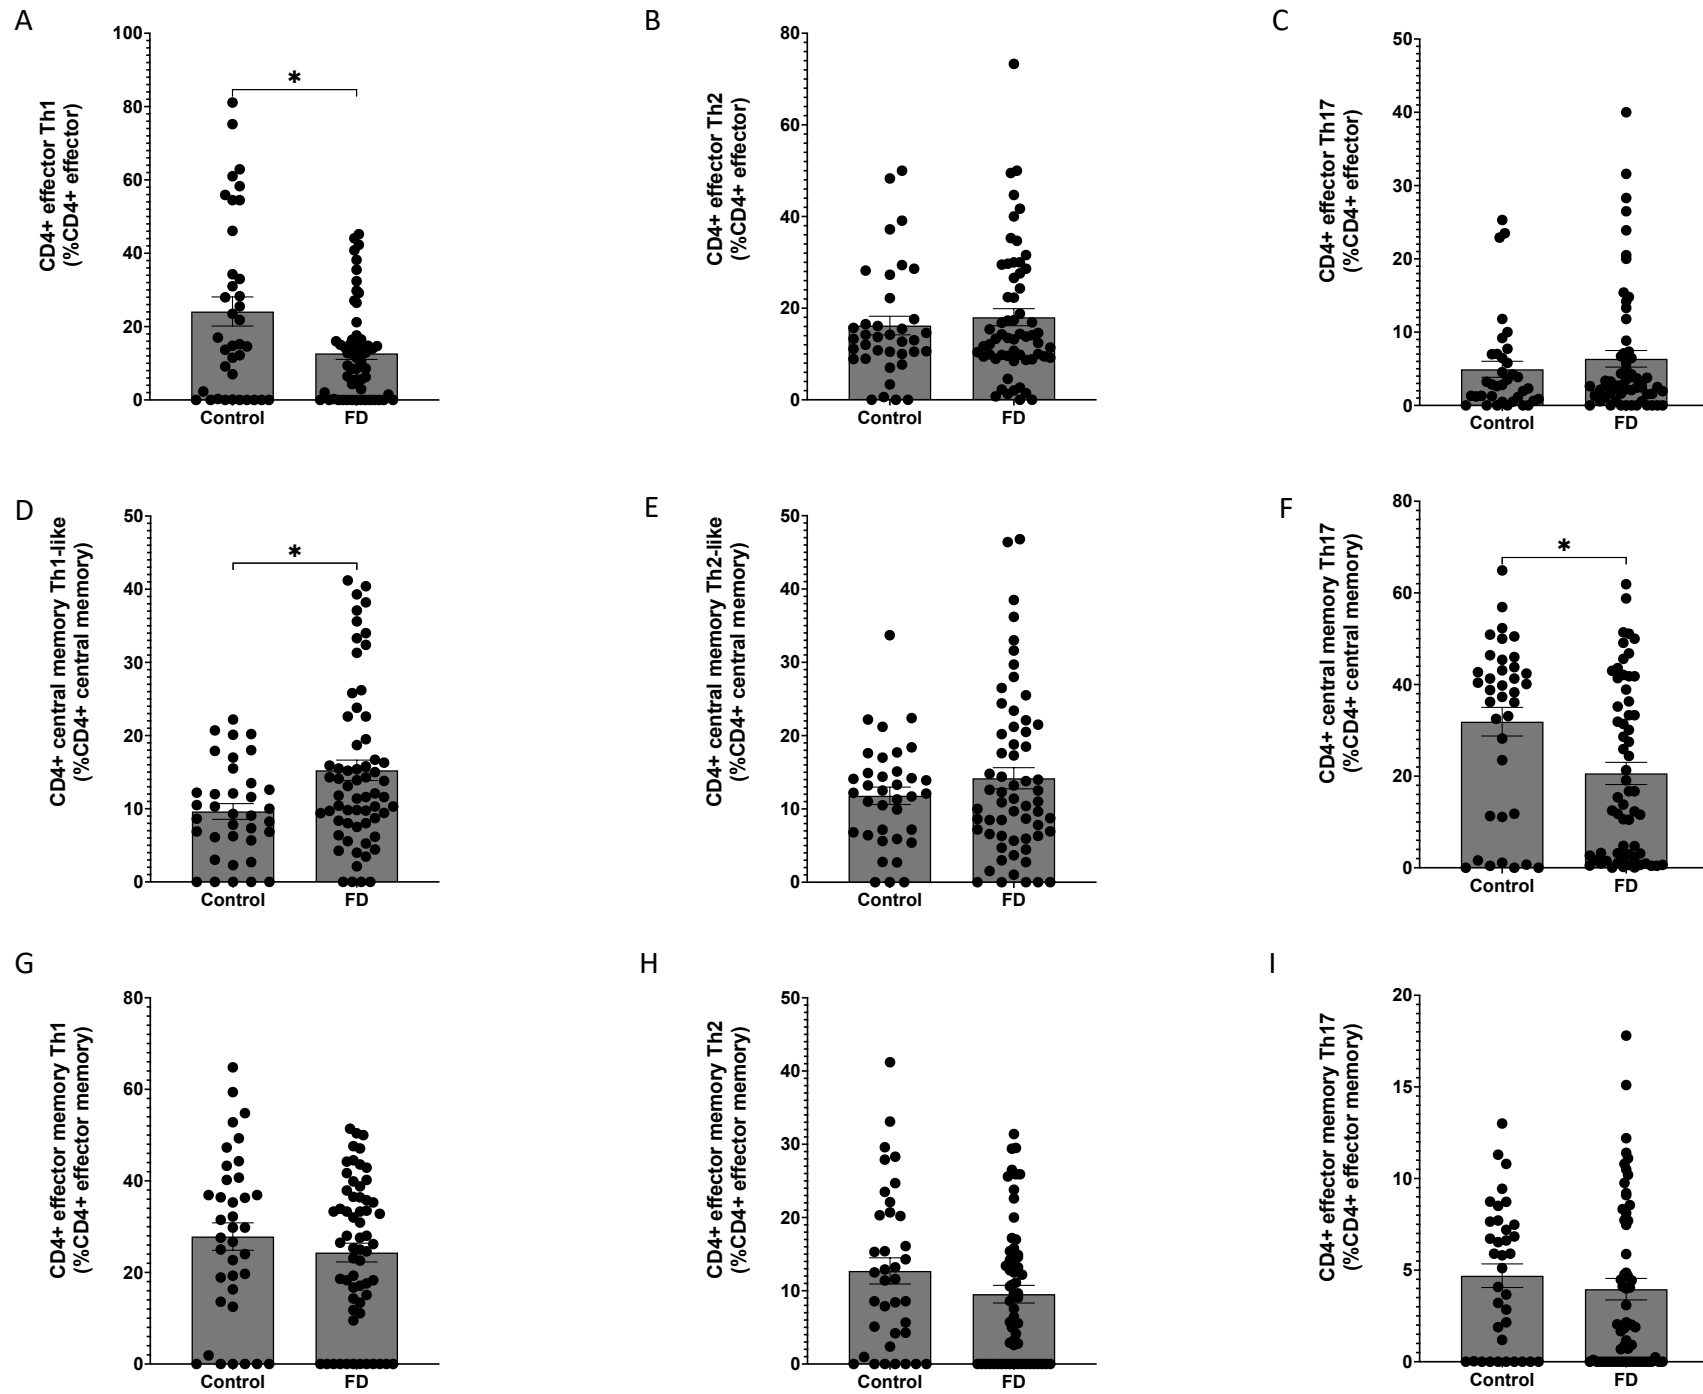

**Supplementary Figure 5: T helper subsets in FD patients compared to controls.**

Peripheral blood mononuclear cells were isolated from whole blood. Cells were phenotyped using flow cytometry. Within the CD4<sup>+</sup> effector T cell (CD45RA<sup>+</sup> CCR7<sup>+</sup>), central memory (CD45RO<sup>+</sup> CCR7<sup>+</sup>) and effector memory CD45RO<sup>+</sup> CCR7<sup>-</sup>) pools, T helper cell subsets were identified based on expression of CCR6, CCR4 and CXCR3. Within the peripheral effector populations, (A) Th1-like, (B) Th2-like and (C) Th17-like cells were investigated in FD patients compared to controls. (D) Th1-like, (E) Th2-like and (F) Th17-like central memory, as well as (G) Th1-like, (H) Th2-like and (I) Th17-like effector memory T cell populations were also investigated in this cohort. n=37 controls, n=61 FD for PBMCs. Data presented as mean±SEM. Statistical analysis for control vs FD, non-parametric t test. \**p*<0.05.



A

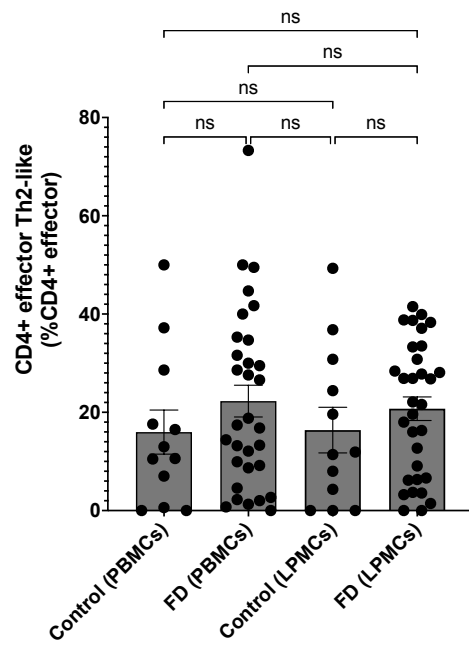

B

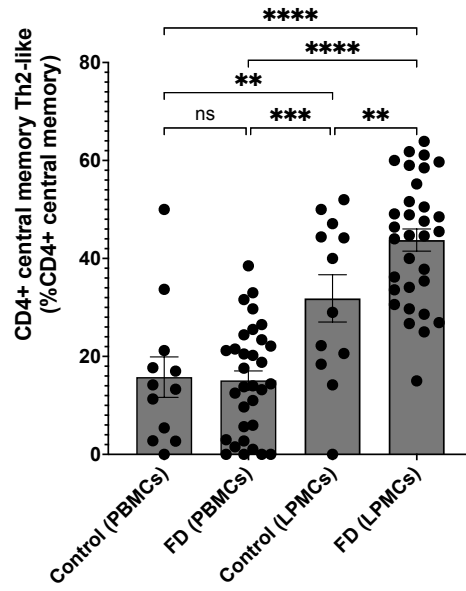

C

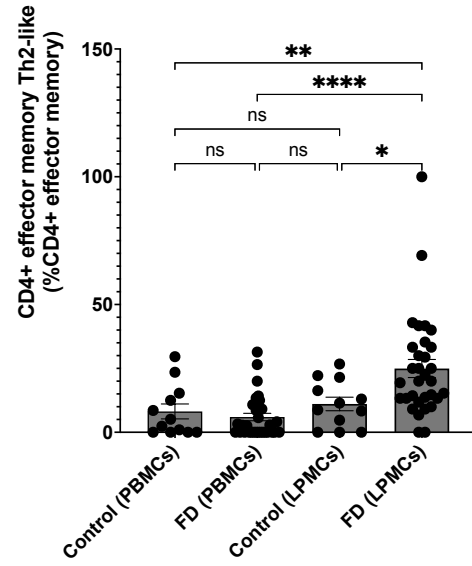

D

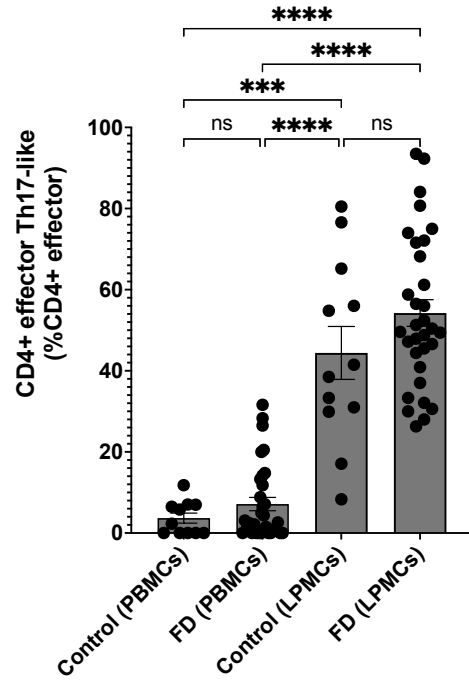

E

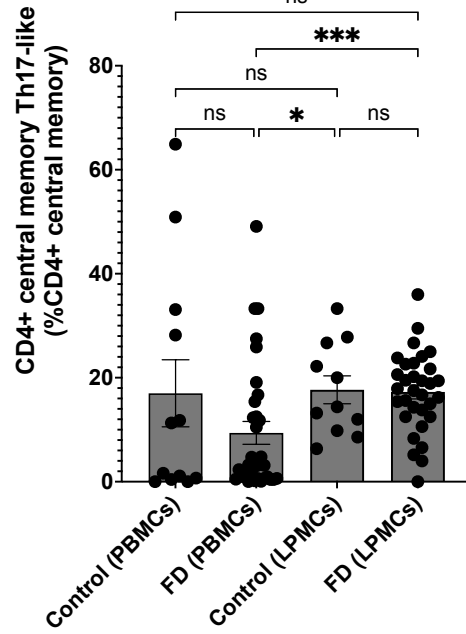

F

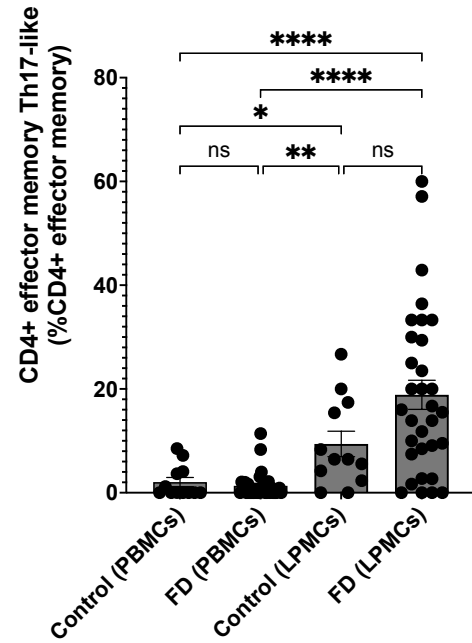

**Supplementary Figure 6: Comparison of control and FD peripheral blood and duodenal mucosal cell populations.**

Analysis of participants who provided matched blood and biopsy samples for analysis by flow cytometry were investigated for CD4<sup>+</sup> Th2-like cells in the (A) effector, (B) central memory and (C) effector memory populations; as well as the CD4<sup>+</sup> Th17-like populations in the (D) effector, (E) central memory and (F) effector memory pools. n=12 controls, n=32 for FD. Data presented as mean±SEM. Statistical analysis: Non-parametric ANOVA. \* $p$ <0.05, \*\* $p$ <0.01, \*\*\* $p$ <0.001.

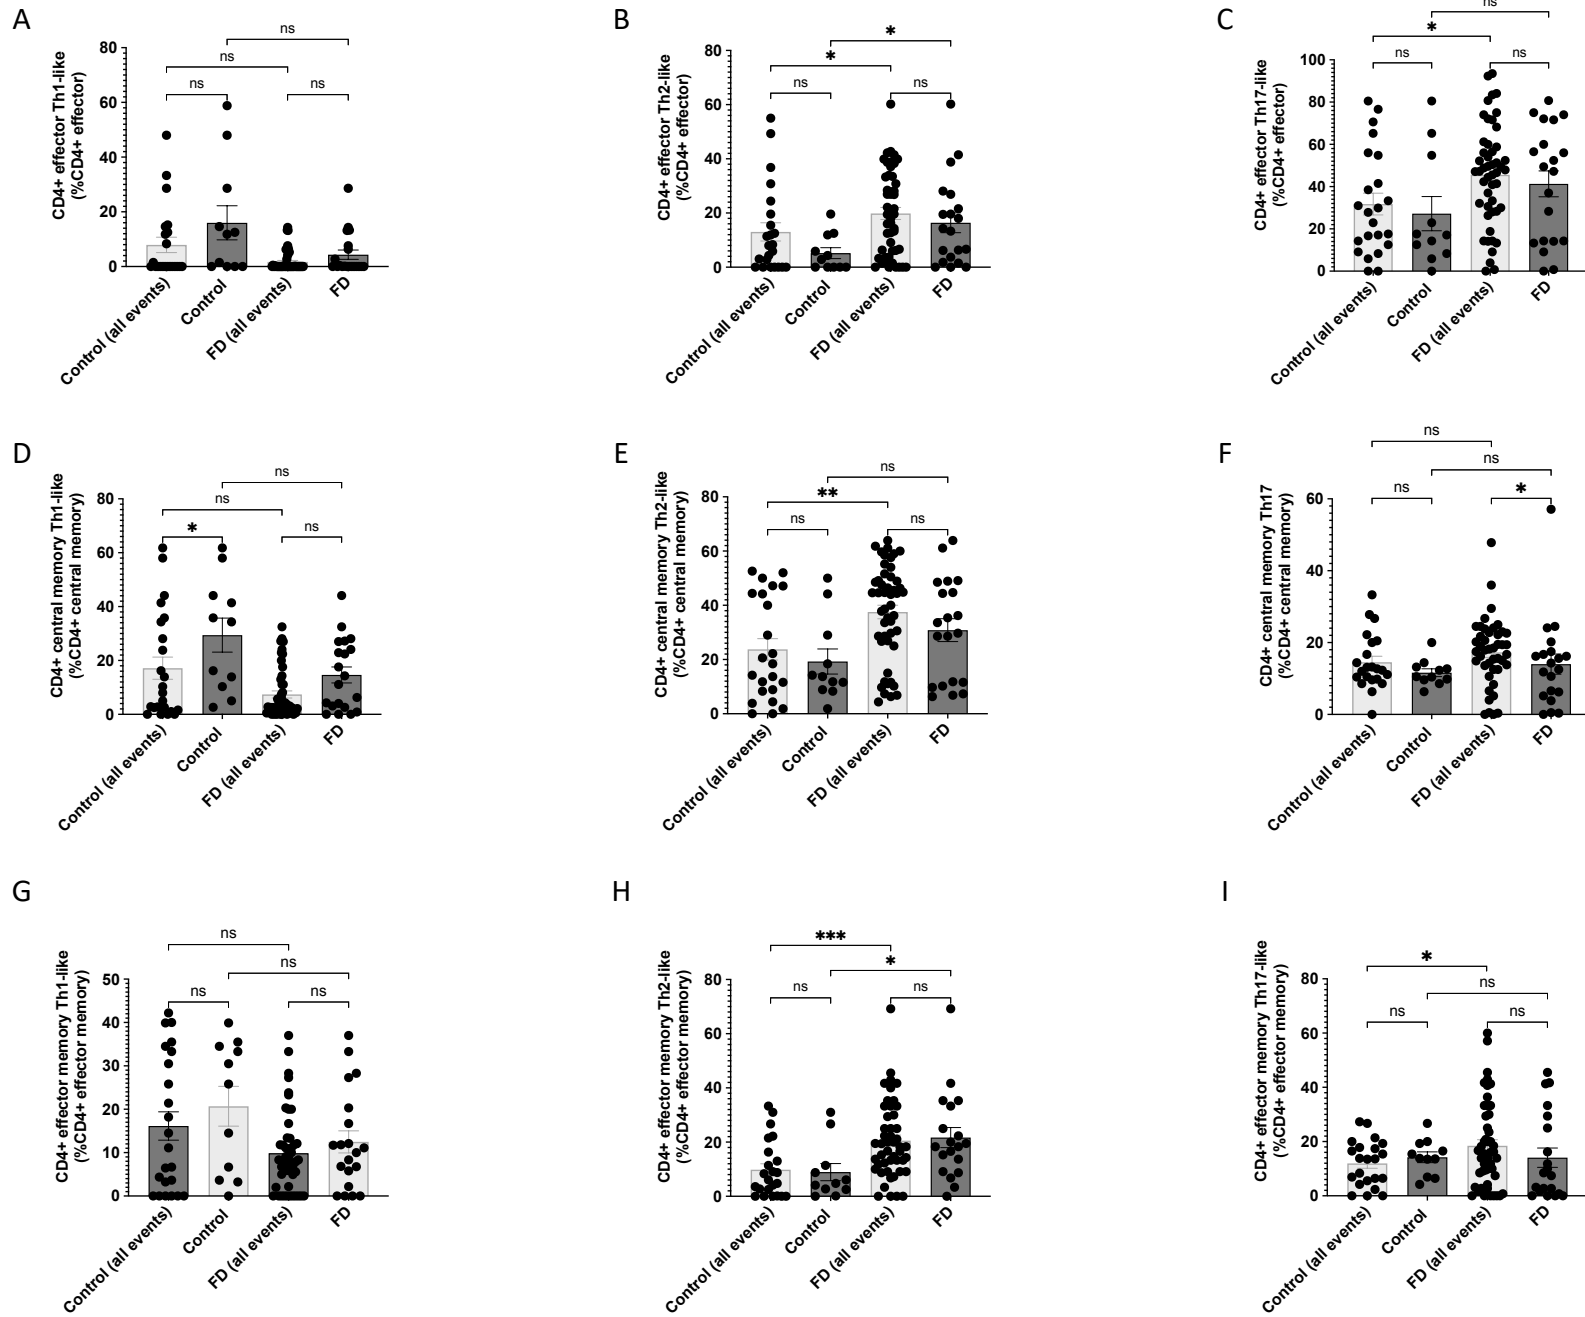

**Supplementary Figure 7: Sensitivity analysis of mucosal samples with the maximum event number recorded compared to the entire FD and control cohorts.**

Effector (A) Th1, (B) Th2, (C) Th17; central memory (D) Th1, (E) Th2, (F) Th17 and effector memory (G) Th1, (H) Th2, (I) Th17 –like populations in duodenal samples with the maximum event number recorded (‘all events’) were compared to the total cohort to test if the low event number in some samples may contribute to the findings. Data presented as mean±SEM. Statistical analysis: (A, B, C, D, E, F, G, H) Non-parametric ANOVA, (I) parametric one-way ANOVA. \*p<0.05, \*\*p<0.01, \*\*\*p<0.001.

A

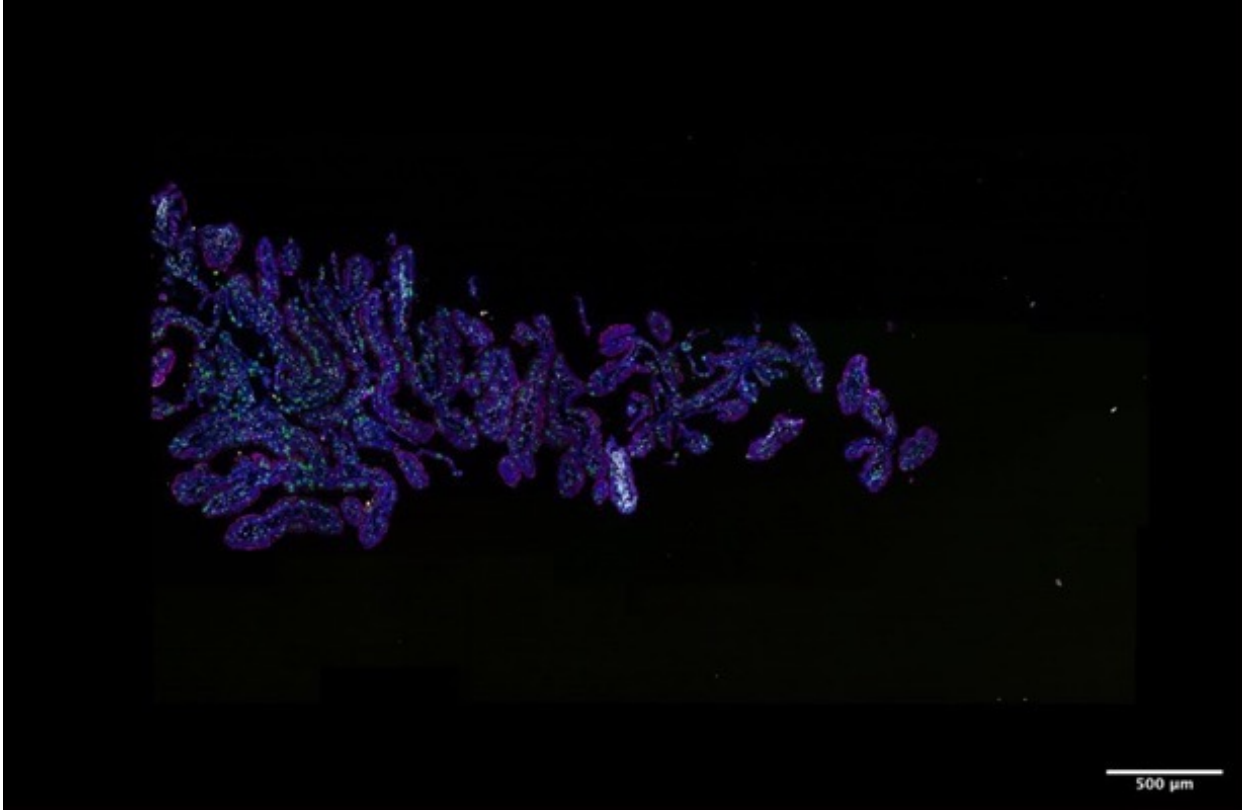

B

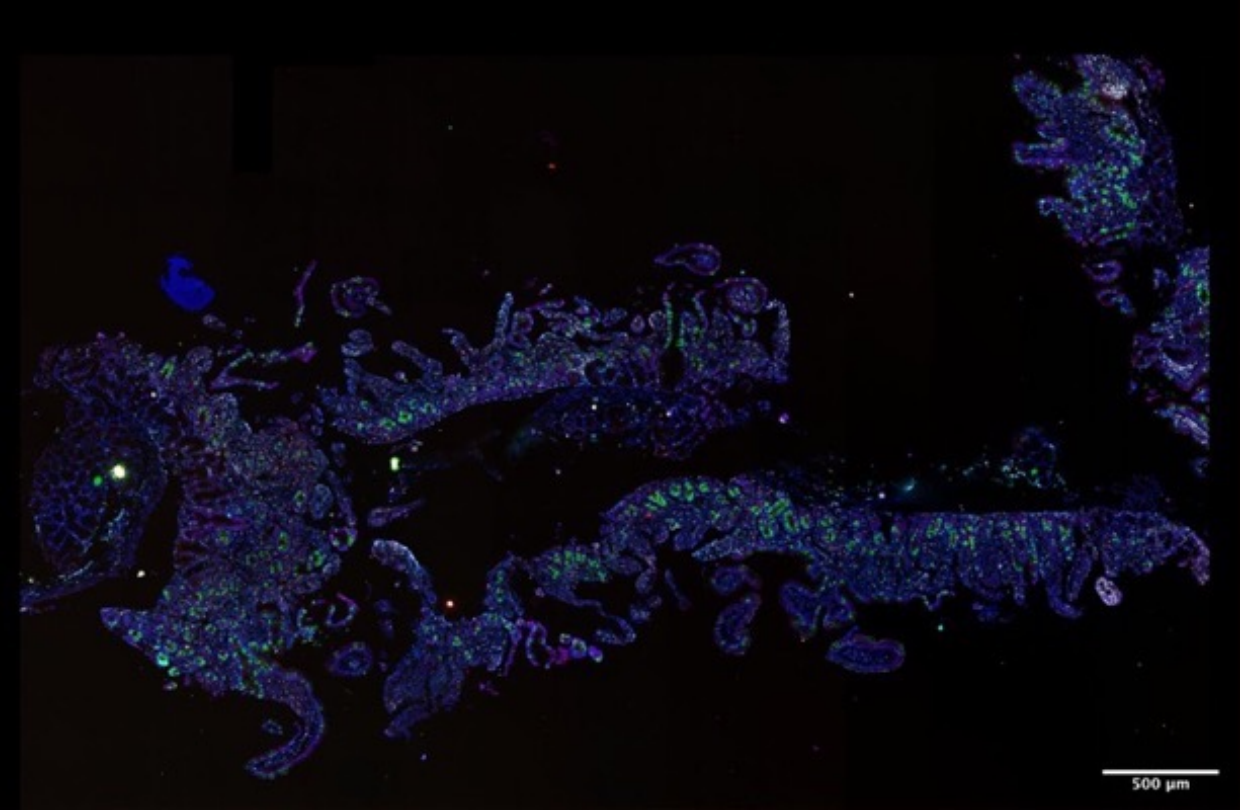

DAPI CD3e CD20 CD8 CD68 PanCK CD44 CD45RO CD11c CD107a CD14 CD4

Scale bar = 500μM, 2.15x zoom

C

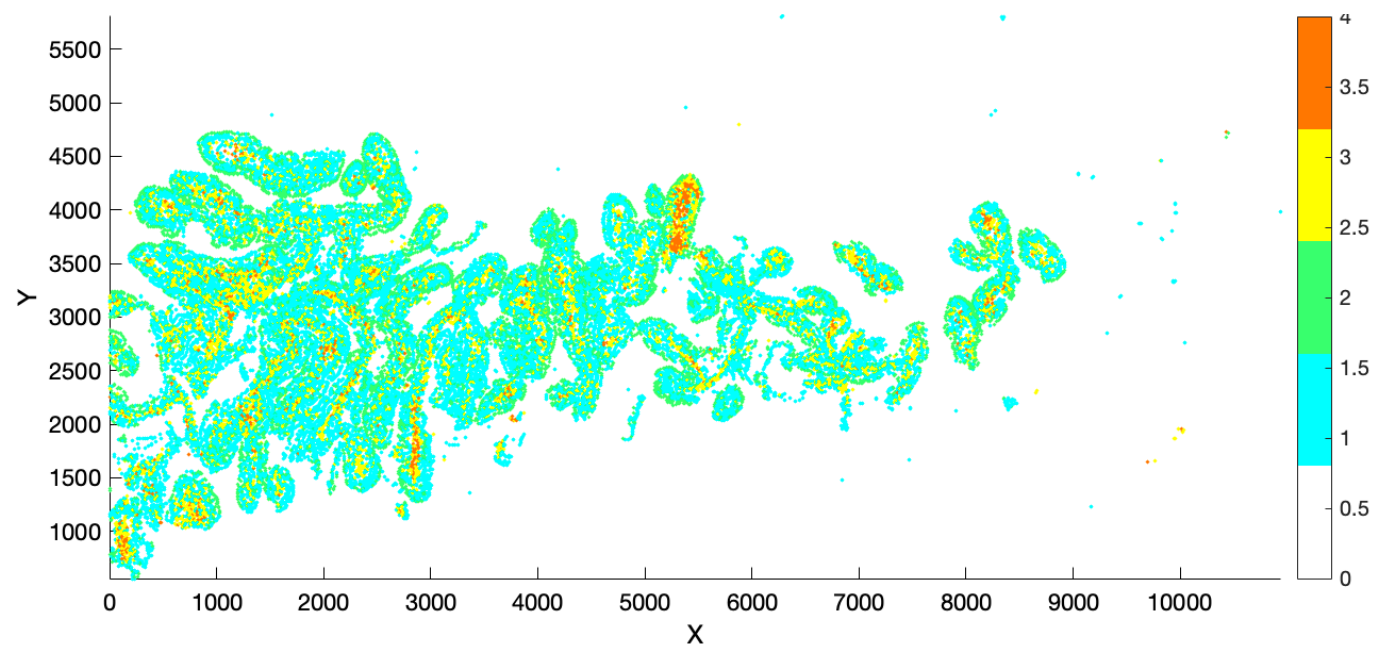

D

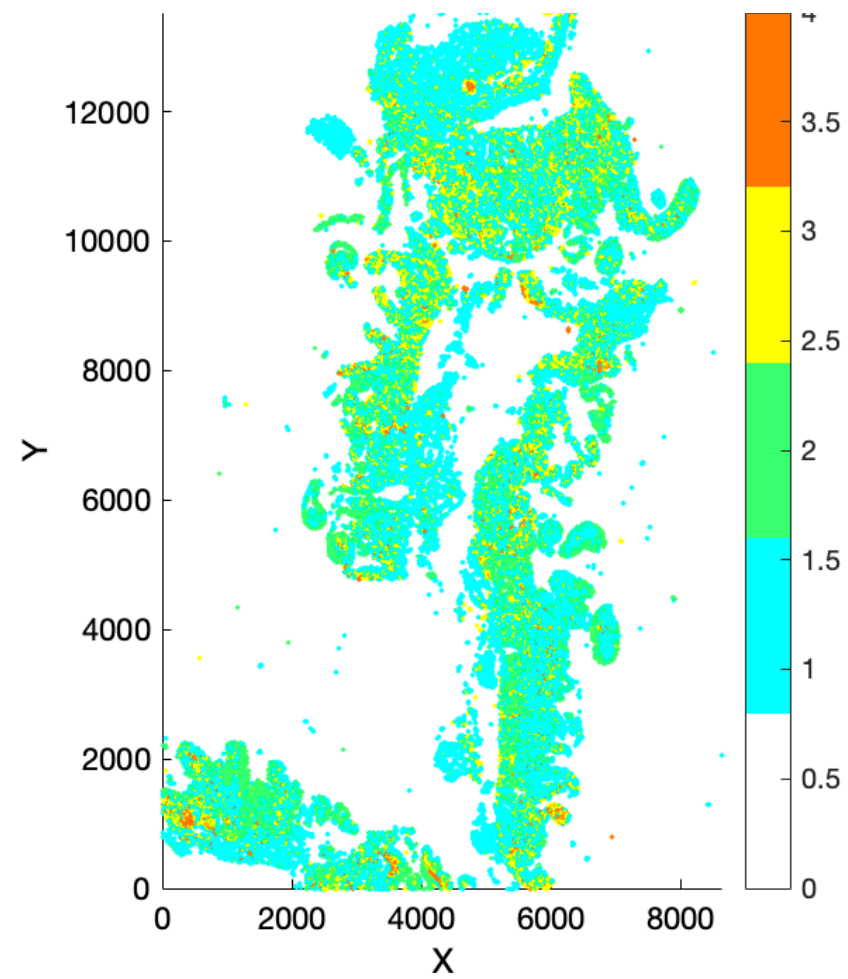

**Supplementary Figure 8: Duodenal biopsies analysed using Akoya Phenocycler platform.**

Images are to demonstrate the size and general structure of the biopsies used for the (A) control and (B) FD patient. Scale bar = 500 $\mu$ M, images taken at 2.15x zoom. CytoMAP was used to algorithmically cluster cells into regions with similarities and a graphical representation of the distribution of these regions throughout the biopsies is provided for the (C) control and (D) FD sample.

A

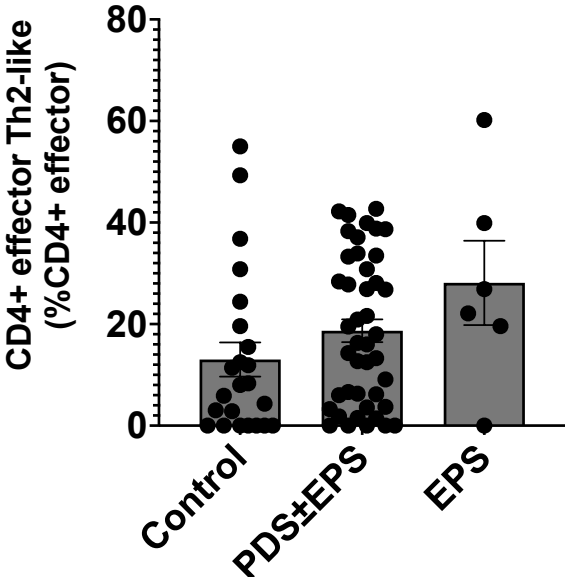

B

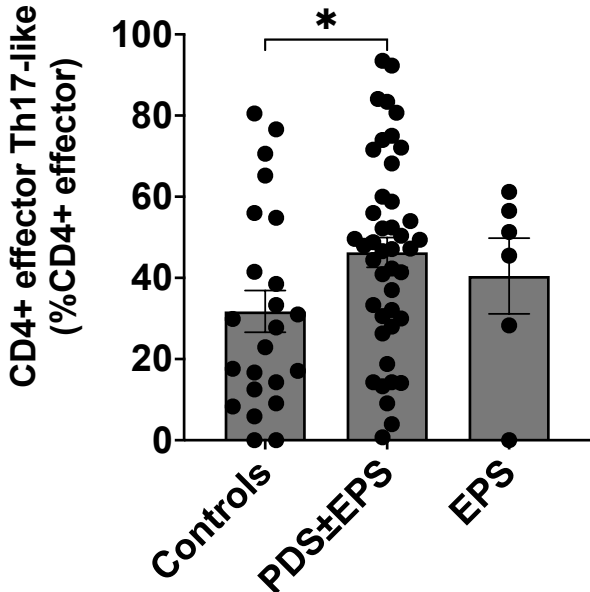

C

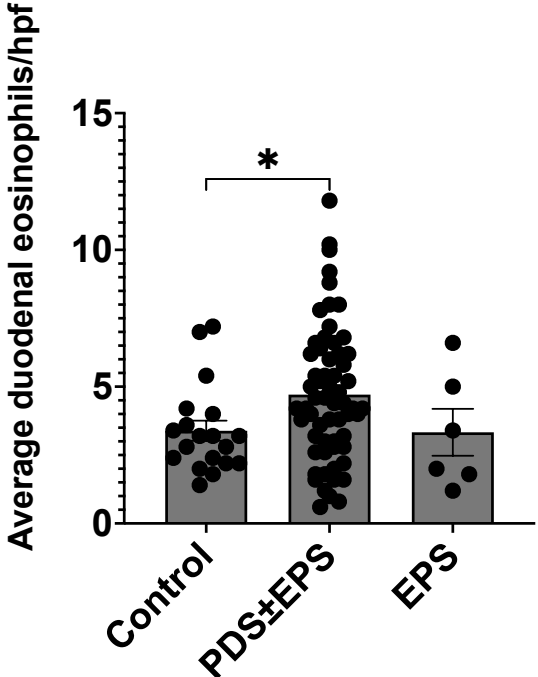



**Supplementary Figure 9: Salient findings in FD separated by meal-associated symptoms compared to epigastric symptoms only.**

The (A) CD4<sup>+</sup> effector Th2-like, (B) effector Th17-like and (C) duodenal eosinophil numbers were investigated in FD patients classified by those with (n=43) and without (n=6) meal associated symptoms, compared to those with epigastric pain only. n=12 controls, n=32 for FD. Data presented as mean±SEM. Statistical analysis: Non-parametric ANOVA. \* $p < 0.05$ .
